# Supplementary material for: A serious game to explore human foraging in a 3D environment
Source: PLoS One. 2019 Jul 25;14(7):e0219827. doi: 10.1371/journal.pone.0219827 (PMC6657838; doi:10.1371/journal.pone.0219827)
Supplement: S2 File — This file is in xlsx format and does contain header information. The column labels are the same as for S1 File. (XLSX) [file pone.0219827.s002.xlsx]

## Sheet: CorrectOnly
PPT	conjunctionondition	Trial	ClickCount	TargetName	Z	Y	X	ITT	Distance
1	feature	1	1	acorn_blue	-2.9	0.3	1.7	0	0
1	feature	1	2	acorn_blue	-4	0.1	0.6	3951	1.55563
1	feature	1	3	acorn_red	-5.3	-0.1	1.8	3166	1.76918
1	feature	1	4	acorn_red	-6.2	-0.3	2.9	1117	1.42127
1	feature	1	5	acorn_blue	-6.7	-0.4	4.1	949	1.3
1	feature	1	6	acorn_blue	-12.1	-0.1	5.9	6067	5.6921
1	feature	1	7	acorn_red	-13.7	0.1	9.1	4084	3.57771
1	feature	1	8	acorn_blue	-13.2	0.2	11.8	2867	2.74591
1	feature	1	9	acorn_red	-12	0.3	13.8	1818	2.33238
1	feature	1	10	acorn_red	-6.2	0	13.5	5050	5.80775
1	feature	1	11	acorn_red	-4.9	-0.1	11.5	4017	2.38537
1	feature	1	12	acorn_blue	-6.2	-0.1	10	2819	1.98494
1	feature	1	13	acorn_blue	-8.6	-0.2	9.3	1931	2.5
1	feature	1	14	acorn_red	-11	0	8.9	1784	2.43311
1	feature	1	15	acorn_red	-15.8	0.2	10.5	3966	5.05964
1	feature	1	16	acorn_blue	-16.4	0.3	7.5	2750	3.05941
1	feature	1	17	acorn_red	-17	0.3	2.4	3851	5.13517
1	feature	1	18	acorn_red	-17.5	0.3	-3.3	4351	5.72189
1	feature	1	19	acorn_red	-15.4	0.2	-5.1	4352	2.76586
1	feature	1	20	acorn_blue	-16	0.3	-6.3	1630	1.34164
1	feature	1	21	acorn_blue	-14.4	0.1	-9.3	4150	3.4
1	feature	1	22	acorn_red	-13.9	0.2	-11.3	1551	2.06155
1	feature	1	23	acorn_red	-11.4	0	-11.7	3166	2.5318
1	feature	1	24	acorn_red	-9.7	0.3	-15.6	3635	4.25441
1	feature	1	25	acorn_blue	-7.4	0.2	-15.6	2899	2.3
1	feature	1	26	acorn_blue	-6.6	0.3	-16.5	2168	1.20416
1	feature	1	27	acorn_blue	-3.9	0	-13.2	8250	4.2638
1	feature	1	28	acorn_red	-5.8	-0.1	-12.7	2367	1.96469
1	feature	1	29	acorn_blue	-6.1	-0.3	-10.1	2202	2.61725
1	feature	1	30	acorn_blue	-7.1	-0.2	-9.4	2263	1.22066
1	feature	2	1	acorn_blue	-4	0.1	0.6	0	0
1	feature	2	2	acorn_red	-5.3	-0.1	1.8	1450	1.76918
1	feature	2	3	acorn_blue	-6.7	-0.4	4.1	2100	2.69258
1	feature	2	4	acorn_red	-7.6	-0.4	6	2718	2.10238
1	feature	2	5	acorn_blue	-8.7	-0.2	7	1300	1.48661
1	feature	2	6	acorn_blue	-8.6	-0.2	9.3	2016	2.30217
1	feature	2	7	acorn_red	-9.3	-0.1	10.9	1450	1.74642
1	feature	2	8	acorn_red	-10.6	0.1	13.6	2334	2.99666
1	feature	2	9	acorn_red	-0.9	0.1	14.1	10166	9.71288
1	feature	2	10	acorn_red	-2	-0.3	10.7	4200	3.57351
1	feature	2	11	acorn_blue	-1.6	-0.5	7.7	3200	3.02655
1	feature	2	12	acorn_red	-1.7	-0.4	6.4	1035	1.30384
1	feature	2	13	acorn_blue	-2	-0.3	5.4	1899	1.04403
1	feature	2	14	acorn_red	-1	0.1	4	1534	1.72047
1	feature	2	15	acorn_red	-2.1	0.3	2.8	2585	1.62788
1	feature	2	16	acorn_red	-2.9	0.3	1.7	1200	1.36015
1	feature	2	17	acorn_blue	-5.5	-0.2	-0.8	3834	3.60694
1	feature	2	18	acorn_blue	-5	-0.1	-1.8	2148	1.11803
1	feature	2	19	acorn_blue	-2.6	-0.3	-5.6	3417	4.49444
1	feature	2	20	acorn_blue	-3.9	-0.1	-9.5	4617	4.11096
1	feature	2	21	acorn_blue	-6.1	-0.3	-10.1	2468	2.28035
1	feature	2	22	acorn_blue	-7.1	-0.2	-9.4	2133	1.22066
1	feature	2	23	acorn_blue	-7.2	-0.3	-8.2	1800	1.20416
1	feature	2	24	acorn_blue	-8.1	-0.3	-5.3	4717	3.03645
1	feature	2	25	acorn_red	-9.8	-0.2	-4.7	2933	1.80278
1	feature	2	26	acorn_red	-11.3	-0.1	-4.3	1150	1.55242
1	feature	2	27	acorn_blue	-13	0	-4.5	2334	1.71172
1	feature	2	28	acorn_blue	-15	0.2	-3.7	1716	2.15407
1	feature	2	29	acorn_red	-17.5	0.3	-3.3	1966	2.5318
1	feature	2	30	acorn_red	-16	0.3	-6.3	4252	3.3541
1	feature	3	1	acorn_red	-2.9	0.3	1.7	0	0
1	feature	3	2	acorn_red	-2.1	0.3	2.8	2248	1.36015
1	feature	3	3	acorn_red	0.6	0.5	3	2084	2.7074
1	feature	3	4	acorn_red	2.3	0.5	2.5	1433	1.772
1	feature	3	5	acorn_red	3.6	0.3	1.9	1084	1.43178
1	feature	3	6	acorn_red	4.7	0.1	1.5	850	1.17047
1	feature	3	7	acorn_blue	3.9	0.1	3	4350	1.7
1	feature	3	8	acorn_blue	4.3	-0.1	3.9	2934	0.984886
1	feature	3	9	acorn_blue	5.8	-0.2	3.1	2533	1.7
1	feature	3	10	acorn_red	6.3	-0.4	5.4	3984	2.35372
1	feature	3	11	acorn_red	5	-0.4	7.6	1917	2.55539
1	feature	3	12	acorn_blue	1.8	-0.4	7.5	3400	3.20156
1	feature	3	13	acorn_blue	-0.3	-0.2	5.6	3300	2.83196
1	feature	3	14	acorn_blue	-1.7	-0.4	6.4	2550	1.61245
1	feature	3	15	acorn_red	-3	-0.5	6.9	1051	1.39284
1	feature	3	16	acorn_blue	-5.9	-0.5	5.4	2719	3.26497
1	feature	3	17	acorn_red	-6.7	-0.4	4.1	1096	1.52643
1	feature	3	18	acorn_red	-6.2	-0.3	2.9	1102	1.3
1	feature	3	19	acorn_blue	-5.5	-0.2	-0.8	5066	3.76563
1	feature	3	20	acorn_blue	-5	-0.1	-1.8	817	1.11803
1	feature	3	21	acorn_red	-1.9	-0.1	-4.1	5317	3.86005
1	feature	3	22	acorn_blue	-0.3	-0.2	-5.1	2302	1.8868
1	feature	3	23	acorn_red	0.7	-0.3	-6.4	1365	1.64012
1	feature	3	24	acorn_red	1.2	0	-4.5	3250	1.96469
1	feature	3	25	acorn_blue	1.2	0.4	-2.7	1416	1.8
1	feature	3	26	acorn_blue	1.8	0.3	-2.7	1751	0.6
1	feature	3	27	acorn_blue	2.8	0.1	-3.8	1283	1.48661
1	feature	3	28	acorn_blue	4.4	-0.2	-3.2	2918	1.7088
1	feature	3	29	acorn_red	6.8	-0.6	-3.3	2448	2.40208
1	feature	3	30	acorn_blue	8.2	-0.5	-2.8	1168	1.48661
1	feature	4	1	acorn_red	-4	0.1	0.6	0	0
1	feature	4	2	acorn_blue	-5.3	-0.1	1.8	2332	1.76918
1	feature	4	3	acorn_red	-6.7	-0.4	4.1	3534	2.69258
1	feature	4	4	acorn_blue	-7.6	-0.4	6	2100	2.10238
1	feature	4	5	acorn_blue	-6.9	-0.3	7.7	2353	1.83848
1	feature	4	6	acorn_red	-5.2	-0.5	7.4	2680	1.72627
1	feature	4	7	acorn_blue	-3	-0.5	6.9	1817	2.2561
1	feature	4	8	acorn_blue	-1.6	-0.5	7.7	2217	1.61245
1	feature	4	9	acorn_red	-1.7	-0.4	6.4	3234	1.30384
1	feature	4	10	acorn_red	-0.3	-0.2	5.6	2599	1.61245
1	feature	4	11	acorn_red	0.1	0.1	4.1	3016	1.55242
1	feature	4	12	acorn_red	-1	0.1	4	2269	1.10454
1	feature	4	13	acorn_blue	-2.1	0.3	2.8	1333	1.62788
1	feature	4	14	acorn_red	-2.9	0.3	1.7	1100	1.36015
1	feature	4	15	acorn_blue	-2.8	0.4	-0.8	2934	2.502
1	feature	4	16	acorn_red	-2.5	0.4	-1.9	885	1.14018
1	feature	4	17	acorn_red	-1.9	-0.1	-4.1	1865	2.28035
1	feature	4	18	acorn_blue	0.8	-0.3	-7.4	4550	4.2638
1	feature	4	19	acorn_red	2.2	-0.2	-6.2	2517	1.84391
1	feature	4	20	acorn_blue	2.8	0.1	-3.8	2786	2.47386
1	feature	4	21	acorn_blue	1.8	0.3	-2.7	2080	1.48661
1	feature	4	22	acorn_red	1.2	0.4	-2.7	1318	0.6
1	feature	4	23	acorn_red	2.5	0.5	-0.8	3283	2.30217
1	feature	4	24	acorn_red	3.6	0.3	1.9	2350	2.91548
1	feature	4	25	acorn_blue	3.9	0.1	3	1150	1.14018
1	feature	4	26	acorn_blue	6.3	-0.4	5.4	3850	3.39411
1	feature	4	27	acorn_blue	11.4	0	5.9	4967	5.12445
1	feature	4	28	acorn_red	14.3	0.2	5.5	2285	2.92746
1	feature	4	29	acorn_blue	15.4	0.2	2.7	2799	3.00832
1	feature	4	30	acorn_red	16.9	0.4	2.8	2517	1.50333
1	feature	5	1	acorn_blue	-4.4	0	2.4	0	0
1	feature	5	2	acorn_red	-6.2	-0.3	2.9	2500	1.86815
1	feature	5	3	acorn_blue	-11.7	-0.3	3.6	4335	5.54437
1	feature	5	4	acorn_blue	-17	0.3	2.4	5499	5.43415
1	feature	5	5	acorn_red	-16	0.2	5.4	4286	3.16228
1	feature	5	6	acorn_blue	-12.1	-0.1	5.9	3048	3.93192
1	feature	5	7	acorn_red	-12.5	0	7.5	2533	1.64924
1	feature	5	8	acorn_red	-13.2	0.2	11.8	5686	4.3566
1	feature	5	9	acorn_red	-12	0.3	13.8	3350	2.33238
1	feature	5	10	acorn_red	-7.9	-0.1	11.9	4799	4.51885
1	feature	5	11	acorn_blue	-9.3	-0.1	10.9	2619	1.72047
1	feature	5	12	acorn_blue	-8.6	-0.2	9.3	2764	1.74642
1	feature	5	13	acorn_blue	-11	0	8.9	3550	2.43311
1	feature	5	14	acorn_red	-15.8	0.2	10.5	6384	5.05964
1	feature	5	15	acorn_red	-18	0.4	-1.3	10803	12.0033
1	feature	5	16	acorn_blue	-17.5	0.3	-3.3	2500	2.06155
1	feature	5	17	acorn_red	-15.4	0.2	-5.1	3484	2.76586
1	feature	5	18	acorn_red	-12.7	0	-6	2131	2.84605
1	feature	5	19	acorn_blue	-9.2	-0.1	-5.9	2700	3.50143
1	feature	5	20	acorn_red	-8.9	-0.1	-7.2	2232	1.33417
1	feature	5	21	acorn_blue	-4.8	-0.1	-11.1	4754	5.65862
1	feature	5	22	acorn_red	-3.9	0	-13.2	2664	2.28473
1	feature	5	23	acorn_blue	-5.8	-0.1	-12.7	3950	1.96469
1	feature	5	24	acorn_blue	-6.9	0.1	-13.9	2350	1.62788
1	feature	5	25	acorn_blue	-9.4	0	-12.5	3618	2.86531
1	feature	5	26	acorn_blue	-11.4	0	-11.7	1652	2.15407
1	feature	5	27	acorn_red	-15.4	0.2	-9.6	4915	4.51774
1	feature	5	28	acorn_blue	-15.3	0.2	-8.2	2551	1.40357
1	feature	5	29	acorn_blue	-11.3	-0.1	-4.3	6332	5.58659
1	feature	5	30	acorn_blue	-9.3	-0.4	-2.7	6451	2.56125
1	conjunction	1	1	acorn_blue	-5.3	-0.1	1.8	0	0
1	conjunction	1	2	walnut_red	-6.2	-0.3	2.9	2500	1.42127
1	conjunction	1	3	acorn_blue	-16	0.2	5.4	11652	10.1139
1	conjunction	1	4	walnut_red	-18.3	0.4	4.1	2017	2.64197
1	conjunction	1	5	walnut_red	-15.2	0.1	3	5417	3.28938
1	conjunction	1	6	acorn_blue	-17	0.3	2.4	4753	1.89737
1	conjunction	1	7	walnut_red	-18	0.4	-1.3	5097	3.83275
1	conjunction	1	8	acorn_blue	-13	0	-4.5	8768	5.93633
1	conjunction	1	9	acorn_blue	-11.3	-0.1	-4.3	9748	1.71172
1	conjunction	1	10	walnut_red	-9.2	-0.1	-5.9	3485	2.64008
1	conjunction	1	11	acorn_blue	-8.8	-0.3	-3.9	7900	2.03961
1	conjunction	1	12	acorn_blue	-9.3	-0.1	10.9	23401	14.8084
1	conjunction	1	13	acorn_blue	-7.9	-0.1	11.9	2400	1.72047
1	conjunction	1	14	walnut_red	-6.2	0	13.5	4685	2.33452
1	conjunction	1	15	walnut_red	-0.7	0.5	18.6	7383	7.50067
1	conjunction	1	16	acorn_blue	3.6	0.5	18.4	4536	4.30465
1	conjunction	1	17	acorn_blue	4.7	0.3	14.7	6365	3.86005
1	conjunction	1	18	walnut_red	6	0.1	12.7	2784	2.38537
1	conjunction	1	19	walnut_red	6.4	-0.1	10.9	3517	1.84391
1	conjunction	1	20	acorn_blue	4.7	-0.1	11.5	3952	1.80278
1	conjunction	1	21	acorn_blue	0.5	0.1	12.9	4965	4.42719
1	conjunction	1	22	walnut_red	-2	-0.3	10.7	3350	3.33017
1	conjunction	1	23	walnut_red	-3	-0.5	6.9	2900	3.92938
1	conjunction	1	24	acorn_blue	-3.9	-0.4	5.5	1800	1.66433
1	conjunction	1	25	walnut_red	-5.9	-0.5	5.4	2150	2.0025
1	conjunction	1	26	walnut_red	-8.6	-0.2	9.3	5002	4.74342
1	conjunction	1	27	walnut_red	-15.3	0.2	-8.2	27450	18.7387
1	conjunction	1	28	acorn_blue	-11.4	0	-11.7	7851	5.24023
1	conjunction	1	29	acorn_blue	-9.4	0	-12.5	3033	2.15407
1	conjunction	1	30	walnut_red	-9.1	0.2	-14	4983	1.52971
1	conjunction	2	1	acorn_blue	-4	0.1	0.6	0	0
1	conjunction	2	2	acorn_blue	-5.5	-0.2	-0.8	1551	2.05183
1	conjunction	2	3	walnut_red	-8.8	-0.3	-3.9	3901	4.52769
1	conjunction	2	4	acorn_blue	-11.3	-0.1	-4.3	4216	2.5318
1	conjunction	2	5	walnut_red	-13	0	-4.5	2434	1.71172
1	conjunction	2	6	acorn_blue	-12.7	0	-6	5116	1.52971
1	conjunction	2	7	acorn_blue	-18	0.4	-1.3	9767	7.08378
1	conjunction	2	8	acorn_blue	-13.4	0	3.5	6651	6.64831
1	conjunction	2	9	walnut_red	-12.5	0	7.5	6938	4.1
1	conjunction	2	10	acorn_blue	-12	0.2	11.8	4563	4.32897
1	conjunction	2	11	walnut_red	-10.6	0.1	13.6	2752	2.28035
1	conjunction	2	12	acorn_blue	-7.9	-0.1	11.9	5499	3.19061
1	conjunction	2	13	acorn_blue	-6.2	0	13.5	6084	2.33452
1	conjunction	2	14	acorn_blue	-6.1	0.3	16.6	3783	3.10161
1	conjunction	2	15	acorn_blue	-4.9	-0.1	11.5	7233	5.23927
1	conjunction	2	16	walnut_red	-8.7	-0.2	7	7800	5.88982
1	conjunction	2	17	acorn_blue	-11.7	-0.3	3.6	5035	4.53431
1	conjunction	2	18	walnut_red	-6.2	-0.3	2.9	6969	5.54437
1	conjunction	2	19	walnut_red	-2.5	0.4	-1.9	8031	6.06053
1	conjunction	2	20	walnut_red	-1.2	0.4	-2.9	3971	1.64012
1	conjunction	2	21	acorn_blue	-1	-0.4	-6.4	6531	3.50571
1	conjunction	2	22	walnut_red	-1	0.1	4	15932	10.4
1	conjunction	2	23	acorn_blue	-2	-0.3	5.4	2517	1.72047
1	conjunction	2	24	acorn_blue	-1.7	-0.4	6.4	2101	1.04403
1	conjunction	2	25	walnut_red	-3	-0.5	6.9	2418	1.39284
1	conjunction	2	26	walnut_red	-3.9	-0.4	5.5	4866	1.66433
1	conjunction	2	27	acorn_blue	2.8	-0.2	10.3	8484	8.24197
1	conjunction	2	28	walnut_red	2.7	0	11.7	2483	1.40357
1	conjunction	2	29	walnut_red	0.5	0.1	12.9	3083	2.50599
1	conjunction	2	30	walnut_red	-0.9	0.1	14.1	1418	1.84391
1	conjunction	3	1	walnut_red	-2.9	0.3	1.7	0	0
1	conjunction	3	2	walnut_red	-2.1	0.3	2.8	2334	1.36015
1	conjunction	3	3	acorn_blue	-2	-0.3	5.4	4451	2.60192
1	conjunction	3	4	walnut_red	-3.3	-0.4	9.2	2988	4.01622
1	conjunction	3	5	walnut_red	-7.9	-0.1	11.9	4928	5.33385
1	conjunction	3	6	walnut_red	-12	0.3	13.8	3433	4.51885
1	conjunction	3	7	acorn_blue	-12	0.2	11.8	4051	2
1	conjunction	3	8	acorn_blue	-8.7	-0.2	7	4416	5.82495
1	conjunction	3	9	walnut_red	-5.9	-0.5	5.4	4402	3.2249
1	conjunction	3	10	acorn_blue	-4.4	0	2.4	3516	3.3541
1	conjunction	3	11	walnut_red	2.4	0.6	0.6	8053	7.0342
1	conjunction	3	12	acorn_blue	4.7	0.1	1.5	3132	2.46982
1	conjunction	3	13	walnut_red	3.6	0.3	1.9	3332	1.17047
1	conjunction	3	14	acorn_blue	-1.2	0.4	-2.9	8884	6.78823
1	conjunction	3	15	acorn_blue	1.2	0	-4.5	5134	2.88444
1	conjunction	3	16	walnut_red	4.4	-0.2	-3.2	3851	3.45398
1	conjunction	3	17	acorn_blue	5.6	-0.2	-1.4	4066	2.16333
1	conjunction	3	18	acorn_blue	11.4	0	5.9	12168	9.32363
1	conjunction	3	19	acorn_blue	15	0.2	1.3	12600	5.84123
1	conjunction	3	20	walnut_red	15.9	0.3	-0.9	1900	2.37697
1	conjunction	3	21	walnut_red	15.9	0.4	-7.8	9967	6.9
1	conjunction	3	22	acorn_blue	13.5	0.1	-7.7	3951	2.40208
1	conjunction	3	23	walnut_red	8.1	-0.3	-9.1	6550	5.57853
1	conjunction	3	24	acorn_blue	9.1	-0.1	-12.5	3234	3.54401
1	conjunction	3	25	acorn_blue	7.6	0.1	-15.3	2716	3.17648
1	conjunction	3	26	walnut_red	5.3	0.2	-17	3652	2.86007
1	conjunction	3	27	acorn_blue	2.4	0.3	-17.8	2432	3.00832
1	conjunction	3	28	acorn_blue	1.2	0.3	-18.6	2151	1.44222
1	conjunction	3	29	walnut_red	0.8	0.2	-17	2566	1.64924
1	conjunction	3	30	walnut_red	-2.1	0.2	-13.9	5200	4.245
1	conjunction	4	1	walnut_red	-6.9	0.1	-13.9	0	0
1	conjunction	4	2	walnut_red	-3.9	0	-13.2	5616	3.08058
1	conjunction	4	3	walnut_red	-3	-0.1	-11.2	4050	2.19317
1	conjunction	4	4	acorn_blue	-1.8	-0.2	-9.3	4351	2.24722
1	conjunction	4	5	walnut_red	0.7	-0.3	-6.4	9286	3.82884
1	conjunction	4	6	acorn_blue	-1.9	-0.1	-4.1	5581	3.47131
1	conjunction	4	7	acorn_blue	-1.2	0.4	-2.9	2517	1.38924
1	conjunction	4	8	walnut_red	1.2	0.4	-2.7	3150	2.40832
1	conjunction	4	9	acorn_blue	4.7	0.1	1.5	6473	5.46717
1	conjunction	4	10	walnut_red	4	-0.5	7	9028	5.54437
1	conjunction	4	11	acorn_blue	-3	-0.5	6.9	10952	7.00071
1	conjunction	4	12	acorn_blue	-7.6	-0.4	6	5801	4.68722
1	conjunction	4	13	walnut_red	-11	0	8.9	8098	4.46878
1	conjunction	4	14	acorn_blue	-12.6	0.1	9.8	2984	1.83576
1	conjunction	4	15	walnut_red	-15.8	0.2	10.5	2566	3.27567
1	conjunction	4	16	walnut_red	-11.9	-0.1	-2	14185	13.0943
1	conjunction	4	17	walnut_red	-11.3	-0.1	-4.3	3950	2.37697
1	conjunction	4	18	acorn_blue	-9.2	-0.1	-5.9	5601	2.64008
1	conjunction	4	19	walnut_red	3.7	0	-14.1	14601	15.2856
1	conjunction	4	20	walnut_red	5.8	0	-13.7	2832	2.13776
1	conjunction	4	21	acorn_blue	9.5	0.1	-14.6	3117	3.80789
1	conjunction	4	22	walnut_red	10.6	0	-13.7	1885	1.42127
1	conjunction	4	23	acorn_blue	10.6	-0.1	-11.8	1716	1.9
1	conjunction	4	24	walnut_red	10.9	-0.3	-7.6	4717	4.2107
1	conjunction	4	25	walnut_red	6.2	-0.6	-4.6	6966	5.57584
1	conjunction	4	26	acorn_blue	5.6	-0.2	-1.4	3585	3.25576
1	conjunction	4	27	acorn_blue	4.3	-0.1	3.9	6750	5.45711
1	conjunction	4	28	walnut_red	-13	0	-4.5	27420	19.2315
1	conjunction	4	29	acorn_blue	-4.8	-0.1	-11.1	10201	10.5262
1	conjunction	4	30	walnut_red	6.3	-0.2	-9.8	11582	11.1759
1	conjunction	5	1	walnut_red	-6.2	-0.3	2.9	0	0
1	conjunction	5	2	walnut_red	-6.7	-0.4	4.1	2383	1.3
1	conjunction	5	3	walnut_red	-5.9	-0.5	5.4	1717	1.52643
1	conjunction	5	4	walnut_red	-8.7	-0.2	7	6350	3.2249
1	conjunction	5	5	acorn_blue	-11.7	-0.3	3.6	4970	4.53431
1	conjunction	5	6	walnut_red	-18	0.4	-1.3	8165	7.98123
1	conjunction	5	7	acorn_blue	-18.3	0.4	4.1	5634	5.40833
1	conjunction	5	8	walnut_red	-16	0.2	5.4	3117	2.64197
1	conjunction	5	9	walnut_red	-12.5	0	7.5	6916	4.08167
1	conjunction	5	10	walnut_red	-11	0	8.9	2303	2.05183
1	conjunction	5	11	acorn_blue	-9.3	-0.1	10.9	3500	2.62488
1	conjunction	5	12	acorn_blue	-4.9	-0.1	11.5	15016	4.44072
1	conjunction	5	13	walnut_red	-2	-0.3	10.7	5603	3.00832
1	conjunction	5	14	walnut_red	1.5	0.3	14.6	7231	5.24023
1	conjunction	5	15	acorn_blue	-1.8	0.3	16.7	5183	3.91152
1	conjunction	5	16	walnut_red	2.6	0.4	15.8	6984	4.4911
1	conjunction	5	17	walnut_red	10.4	0.3	12.2	13100	8.59069
1	conjunction	5	18	acorn_blue	13.4	0.2	8.2	4018	5
1	conjunction	5	19	walnut_red	10.8	-0.3	1.4	5965	7.28011
1	conjunction	5	20	acorn_blue	9.4	-0.4	-1.6	3968	3.31059
1	conjunction	5	21	acorn_blue	7.6	-0.5	-1.7	2450	1.80278
1	conjunction	5	22	walnut_red	6.8	-0.6	-3.3	2351	1.78885
1	conjunction	5	23	acorn_blue	8.1	-0.3	-9.1	4699	5.9439
1	conjunction	5	24	acorn_blue	8.9	-0.2	-10.8	1451	1.87883
1	conjunction	5	25	walnut_red	9.1	-0.1	-12.5	1500	1.71172
1	conjunction	5	26	acorn_blue	5.3	0.2	-17	4733	5.88982
1	conjunction	5	27	walnut_red	1.2	0.3	-18.6	6577	4.40114
1	conjunction	5	28	walnut_red	1.5	0.3	-15.7	7474	2.91548
1	conjunction	5	29	walnut_red	-2.1	0.2	-13.9	3301	4.02492
1	conjunction	5	30	walnut_red	-0.4	0	-10.8	5601	3.53553
2	feature	1	1	acorn_blue	-2.9	0.3	1.7	0	0
2	feature	1	2	acorn_red	-4.4	0	2.4	3018	1.65529
2	feature	1	3	acorn_red	-5.9	-0.5	5.4	4051	3.3541
2	feature	1	4	acorn_blue	-6.9	-0.3	7.7	2733	2.50799
2	feature	1	5	acorn_blue	-9.3	-0.1	10.9	4751	4
2	feature	1	6	acorn_red	-10.6	0.1	13.6	3532	2.99666
2	feature	1	7	acorn_red	-12	0.3	13.8	2667	1.41421
2	feature	1	8	acorn_red	-13.2	0.2	11.8	3450	2.33238
2	feature	1	9	acorn_blue	-12.6	0.1	9.8	3217	2.08806
2	feature	1	10	acorn_blue	-14.4	0.1	6.6	4300	3.67151
2	feature	1	11	acorn_blue	-15.2	0.1	3	3988	3.68782
2	feature	1	12	acorn_blue	-18	0.4	-1.3	4096	5.13128
2	feature	1	13	acorn_red	-15.4	0.2	-5.1	5068	4.60435
2	feature	1	14	acorn_red	-16	0.3	-6.3	3565	1.34164
2	feature	1	15	acorn_blue	-15.4	0.2	-9.6	6075	3.3541
2	feature	1	16	acorn_blue	-11.8	0.2	-13.1	8100	5.02096
2	feature	1	17	acorn_blue	-9.7	0.3	-15.6	2513	3.26497
2	feature	1	18	acorn_blue	-6.9	0.1	-13.9	8931	3.27567
2	feature	1	19	acorn_red	-5.8	-0.1	-12.7	2383	1.62788
2	feature	1	20	acorn_red	-3	-0.1	-11.2	3518	3.17648
2	feature	1	21	acorn_blue	-0.4	0	-10.8	3265	2.63059
2	feature	1	22	acorn_blue	4.9	-0.1	-9.8	6684	5.39351
2	feature	1	23	acorn_red	8.1	-0.3	-9.1	4114	3.27567
2	feature	1	24	acorn_red	9.5	-0.3	-9	2020	1.40357
2	feature	1	25	acorn_red	10.9	-0.3	-7.6	2806	1.9799
2	feature	1	26	acorn_red	14.2	0.1	-6.8	3828	3.39559
2	feature	1	27	acorn_red	17.2	0.6	-0.5	7934	6.97782
2	feature	1	28	acorn_red	16.9	0.4	0.8	2216	1.33417
2	feature	1	29	acorn_blue	15.4	0.2	2.7	1917	2.42074
2	feature	1	30	acorn_blue	14.1	0	3	3117	1.33417
2	feature	2	1	acorn_red	-5.3	-0.1	1.8	0	0
2	feature	2	2	acorn_blue	-6.2	-0.3	2.9	2216	1.42127
2	feature	2	3	acorn_blue	-5.9	-0.5	5.4	5468	2.51794
2	feature	2	4	acorn_red	-5.2	-0.5	7.4	3190	2.11896
2	feature	2	5	acorn_red	-3.3	-0.4	9.2	2310	2.61725
2	feature	2	6	acorn_blue	-2	-0.3	10.7	1590	1.98494
2	feature	2	7	acorn_blue	0.5	0.1	12.9	2778	3.33017
2	feature	2	8	acorn_red	1.5	0.3	14.6	2982	1.97231
2	feature	2	9	acorn_red	2.6	0.4	15.8	2141	1.62788
2	feature	2	10	acorn_blue	3.8	0.5	16.5	1142	1.38924
2	feature	2	11	acorn_blue	6	0.5	16.3	1856	2.20907
2	feature	2	12	acorn_red	7.8	0.3	13.3	3028	3.49857
2	feature	2	13	acorn_red	6	0.1	12.7	4506	1.89737
2	feature	2	14	acorn_red	2.7	0	11.7	2966	3.44819
2	feature	2	15	acorn_blue	2.8	-0.2	10.3	2579	1.40357
2	feature	2	16	acorn_red	4	-0.5	7	2767	3.51141
2	feature	2	17	acorn_red	4.3	-0.1	3.9	3989	3.11448
2	feature	2	18	acorn_blue	4.7	0.1	1.5	2082	2.43311
2	feature	2	19	acorn_red	3.6	0.3	1.9	3913	1.17047
2	feature	2	20	acorn_blue	2.3	0.5	2.5	2500	1.43178
2	feature	2	21	acorn_blue	5.8	-0.2	3.1	9587	3.55106
2	feature	2	22	acorn_blue	10.5	-0.1	3.4	4930	4.70956
2	feature	2	23	acorn_red	12.6	-0.1	4	1735	2.18403
2	feature	2	24	acorn_red	16.9	0.4	2.8	3733	4.4643
2	feature	2	25	acorn_red	17.2	0.6	-0.5	3618	3.31361
2	feature	2	26	acorn_red	14.7	0.4	-3.6	6966	3.98246
2	feature	2	27	acorn_blue	14	0.2	-5.3	1483	1.83848
2	feature	2	28	acorn_red	13.5	0.1	-7.7	4184	2.45153
2	feature	2	29	acorn_red	14.8	0.2	-9	2854	1.83848
2	feature	2	30	acorn_blue	11.4	-0.2	-5.2	14280	5.09902
2	feature	3	1	acorn_blue	-4	0.1	0.6	0	0
2	feature	3	2	acorn_blue	-6.2	-0.3	2.9	4534	3.18277
2	feature	3	3	acorn_red	-6.7	-0.4	4.1	2135	1.3
2	feature	3	4	acorn_red	-5.9	-0.5	5.4	2131	1.52643
2	feature	3	5	acorn_blue	-5.2	-0.5	7.4	2552	2.11896
2	feature	3	6	acorn_blue	-3.3	-0.4	9.2	2181	2.61725
2	feature	3	7	acorn_red	-2	-0.3	10.7	1455	1.98494
2	feature	3	8	acorn_blue	0.5	0.1	12.9	2830	3.33017
2	feature	3	9	acorn_blue	1.5	0.3	14.6	3250	1.97231
2	feature	3	10	acorn_red	3.6	0.5	18.4	4769	4.34166
2	feature	3	11	acorn_red	3.8	0.5	16.5	3999	1.9105
2	feature	3	12	acorn_blue	4.7	0.3	14.7	3032	2.01246
2	feature	3	13	acorn_red	10.4	0.3	12.2	7319	6.22415
2	feature	3	14	acorn_red	14.5	0.4	11.6	3449	4.14367
2	feature	3	15	acorn_blue	15.9	0.4	9.9	3001	2.20227
2	feature	3	16	acorn_red	17.4	0.4	5.2	5283	4.93356
2	feature	3	17	acorn_blue	15.4	0.2	2.7	5033	3.20156
2	feature	3	18	acorn_blue	13.2	0	-0.3	3968	3.72022
2	feature	3	19	acorn_blue	12.4	0	-2.2	1600	2.06155
2	feature	3	20	acorn_blue	11.4	-0.2	-5.2	3716	3.16228
2	feature	3	21	acorn_blue	10.9	-0.3	-7.6	1917	2.45153
2	feature	3	22	acorn_red	9.5	-0.3	-9	2369	1.9799
2	feature	3	23	acorn_blue	8.9	-0.2	-10.8	2347	1.89737
2	feature	3	24	acorn_red	9.1	-0.1	-12.5	2073	1.71172
2	feature	3	25	acorn_red	10.6	0	-13.7	5462	1.92094
2	feature	3	26	acorn_red	10.6	-0.1	-11.8	2984	1.9
2	feature	3	27	acorn_red	11.3	-0.2	-9.9	4166	2.02485
2	feature	3	28	acorn_red	8	-0.5	-4.9	13235	5.99083
2	feature	3	29	acorn_blue	8.2	-0.5	-2.8	2868	2.1095
2	feature	3	30	acorn_red	7.6	-0.5	-1.7	2082	1.253
2	feature	4	1	acorn_red	-2.9	0.3	1.7	0	0
2	feature	4	2	acorn_blue	-4.4	0	2.4	2566	1.65529
2	feature	4	3	acorn_blue	-6.2	-0.3	2.9	1533	1.86815
2	feature	4	4	acorn_red	-7.6	-0.4	6	3867	3.40147
2	feature	4	5	acorn_red	-6.9	-0.3	7.7	2667	1.83848
2	feature	4	6	acorn_blue	-6.2	-0.1	10	1850	2.40416
2	feature	4	7	acorn_blue	-4.9	-0.1	11.5	2634	1.98494
2	feature	4	8	acorn_blue	-6.2	0	13.5	4405	2.38537
2	feature	4	9	acorn_red	-10.6	0.1	13.6	4761	4.40114
2	feature	4	10	acorn_blue	-15.8	0.2	10.5	6218	6.05392
2	feature	4	11	acorn_red	-16.4	0.3	7.5	5002	3.05941
2	feature	4	12	acorn_blue	-16	0.2	5.4	1566	2.13776
2	feature	4	13	acorn_blue	-18.3	0.4	4.1	3399	2.64197
2	feature	4	14	acorn_red	-18	0.4	-1.3	5401	5.40833
2	feature	4	15	acorn_blue	-17.5	0.3	-3.3	2482	2.06155
2	feature	4	16	acorn_blue	-16	0.3	-6.3	4173	3.3541
2	feature	4	17	acorn_red	-16.8	0.3	-7.8	2811	1.7
2	feature	4	18	acorn_red	-15.4	0.2	-9.6	3184	2.28035
2	feature	4	19	acorn_red	-11.4	0	-11.7	4767	4.51774
2	feature	4	20	acorn_blue	-9.1	0.2	-14	8267	3.25269
2	feature	4	21	acorn_blue	-6.9	0.1	-13.9	3373	2.20227
2	feature	4	22	acorn_red	-3.9	0	-13.2	3344	3.08058
2	feature	4	23	acorn_red	-1.5	0	-12	1984	2.68328
2	feature	4	24	acorn_red	2.6	-0.2	-10.5	3433	4.36578
2	feature	4	25	acorn_blue	3.3	-0.1	-9.2	2752	1.47648
2	feature	4	26	acorn_blue	6.2	-0.6	-4.6	5398	5.43783
2	feature	4	27	acorn_red	8.2	-0.5	-2.8	4206	2.69072
2	feature	4	28	acorn_red	9.4	-0.4	-1.6	1363	1.69706
2	feature	4	29	acorn_blue	10.3	-0.3	2.3	7065	4.0025
2	feature	4	30	acorn_red	10.5	-0.1	3.4	2183	1.11803
2	feature	5	1	acorn_red	-4	0.1	0.6	0	0
2	feature	5	2	acorn_blue	-5.3	-0.1	1.8	2885	1.76918
2	feature	5	3	acorn_red	-6.2	-0.3	2.9	1382	1.42127
2	feature	5	4	acorn_blue	-11.7	-0.3	3.6	6215	5.54437
2	feature	5	5	acorn_red	-5	-0.1	-1.8	11401	8.60523
2	feature	5	6	acorn_blue	-7.2	-0.3	-8.2	6966	6.76757
2	feature	5	7	acorn_red	-7.1	-0.2	-9.4	2151	1.20416
2	feature	5	8	acorn_red	-4.8	-0.1	-11.1	4808	2.86007
2	feature	5	9	acorn_blue	-1.8	-0.2	-9.3	4193	3.49857
2	feature	5	10	acorn_red	0.7	-0.3	-6.4	5417	3.82884
2	feature	5	11	acorn_red	-0.3	-0.2	-5.1	2651	1.64012
2	feature	5	12	acorn_blue	-1.2	0.4	-2.9	2949	2.37697
2	feature	5	13	acorn_red	-1.6	0.5	-1.5	1684	1.45602
2	feature	5	14	acorn_blue	-2.8	0.4	-0.8	2288	1.38924
2	feature	5	15	acorn_blue	-2.5	0.4	-1.9	2623	1.14018
2	feature	5	16	acorn_red	1.2	0.4	-2.7	4539	3.7855
2	feature	5	17	acorn_blue	1.8	0.3	-2.7	1767	0.6
2	feature	5	18	acorn_blue	1.2	0	-4.5	1949	1.89737
2	feature	5	19	acorn_blue	2.2	-0.2	-6.2	2800	1.97231
2	feature	5	20	acorn_red	2.6	-0.2	-10.5	4217	4.31856
2	feature	5	21	acorn_blue	3.9	-0.1	-11.9	2384	1.9105
2	feature	5	22	acorn_blue	3.7	0	-14.1	2933	2.20907
2	feature	5	23	acorn_blue	4	0.1	-15.6	1201	1.52971
2	feature	5	24	acorn_blue	3.6	0.2	-16.7	1788	1.17047
2	feature	5	25	acorn_red	3.7	0.3	-17.8	2012	1.10454
2	feature	5	26	acorn_red	5.3	0.2	-17	2966	1.78885
2	feature	5	27	acorn_red	7.6	0.1	-15.3	5484	2.86007
2	feature	5	28	acorn_blue	10.6	-0.1	-11.8	4655	4.60977
2	feature	5	29	acorn_red	10.6	-0.2	-10.5	2195	1.3
2	feature	5	30	acorn_blue	10.9	-0.3	-7.6	2283	2.91548
2	conjunction	1	1	acorn_blue	-2.9	0.3	1.7	0	0
2	conjunction	1	2	acorn_blue	-4.4	0	2.4	3017	1.65529
2	conjunction	1	3	walnut_red	-6.2	-0.3	2.9	1649	1.86815
2	conjunction	1	4	walnut_red	-7.6	-0.4	6	4852	3.40147
2	conjunction	1	5	acorn_blue	-6.9	-0.3	7.7	1749	1.83848
2	conjunction	1	6	walnut_red	-3.3	-0.4	9.2	5067	3.9
2	conjunction	1	7	acorn_blue	-1.6	-0.5	7.7	2100	2.26716
2	conjunction	1	8	acorn_blue	-2	-0.3	5.4	6067	2.33452
2	conjunction	1	9	acorn_blue	0.1	0.1	4.1	5590	2.46982
2	conjunction	1	10	walnut_red	1.8	-0.4	7.5	6678	3.80132
2	conjunction	1	11	acorn_blue	2.8	-0.2	10.3	3203	2.97321
2	conjunction	1	12	acorn_blue	2.7	0	11.7	1231	1.40357
2	conjunction	1	13	walnut_red	2.6	0.4	15.8	3200	4.10122
2	conjunction	1	14	acorn_blue	3.6	0.5	18.4	2232	2.78568
2	conjunction	1	15	acorn_blue	7.8	0.3	13.3	9701	6.60681
2	conjunction	1	16	walnut_red	4	-0.5	7	16701	7.35731
2	conjunction	1	17	walnut_red	2.8	0.1	-3.8	15659	10.8665
2	conjunction	1	18	walnut_red	-1	-0.4	-6.4	6876	4.60435
2	conjunction	1	19	acorn_blue	-6.1	-0.3	-10.1	6301	6.30079
2	conjunction	1	20	acorn_blue	-5.8	-0.1	-12.7	3433	2.61725
2	conjunction	1	21	acorn_blue	-7.4	0.2	-15.6	3600	3.3121
2	conjunction	1	22	acorn_blue	-6.6	0.3	-16.5	2200	1.20416
2	conjunction	1	23	walnut_red	1.2	0.3	-18.6	6884	8.07775
2	conjunction	1	24	acorn_blue	3.7	0.3	-17.8	4486	2.62488
2	conjunction	1	25	walnut_red	4	0.1	-15.6	4433	2.22036
2	conjunction	1	26	walnut_red	-0.4	0	-10.8	7798	6.51153
2	conjunction	1	27	acorn_blue	0.7	-0.3	-6.4	5417	4.53542
2	conjunction	1	28	acorn_blue	6.2	-0.6	-4.6	8634	5.78705
2	conjunction	1	29	walnut_red	7.6	-0.5	-1.7	8450	3.22025
2	conjunction	1	30	walnut_red	10	-0.4	0.5	3618	3.25576
2	conjunction	2	1	walnut_red	-6.2	-0.3	2.9	0	0
2	conjunction	2	2	walnut_red	-12.5	0	7.5	10295	7.80064
2	conjunction	2	3	walnut_red	-12	0.2	11.8	6251	4.32897
2	conjunction	2	4	acorn_blue	-12	0.3	13.8	1648	2
2	conjunction	2	5	walnut_red	-6.1	0.3	16.6	7601	6.5307
2	conjunction	2	6	acorn_blue	0.5	0.1	12.9	12783	7.56637
2	conjunction	2	7	acorn_blue	2.7	0	11.7	6783	2.50599
2	conjunction	2	8	walnut_red	6	0.1	12.7	5751	3.44819
2	conjunction	2	9	acorn_blue	7.8	0.3	13.3	1601	1.89737
2	conjunction	2	10	acorn_blue	13.4	0.2	8.2	10093	7.5743
2	conjunction	2	11	walnut_red	15	0.2	1.3	10841	7.08308
2	conjunction	2	12	acorn_blue	13.2	0	-0.3	3380	2.40832
2	conjunction	2	13	acorn_blue	8.2	-0.5	-2.8	5554	5.59017
2	conjunction	2	14	walnut_red	4.4	-0.2	-3.2	3884	3.82099
2	conjunction	2	15	walnut_red	1.8	0.3	-2.7	6899	2.64764
2	conjunction	2	16	walnut_red	-2.6	-0.3	-5.6	7368	5.26972
2	conjunction	2	17	walnut_red	-7.1	-0.2	-9.4	4734	5.88982
2	conjunction	2	18	acorn_blue	-12.7	0	-6	13433	6.55134
2	conjunction	2	19	acorn_blue	-8.8	-0.3	-3.9	8368	4.42945
2	conjunction	2	20	acorn_blue	-5.5	-0.2	-0.8	4900	4.52769
2	conjunction	2	21	walnut_red	-8.1	-0.3	-5.3	15171	5.19711
2	conjunction	2	22	acorn_blue	-11.3	-0.1	-4.3	11720	3.35261
2	conjunction	2	23	walnut_red	-15.4	0.2	-5.1	6178	4.17732
2	conjunction	2	24	walnut_red	-17	0.3	2.4	9583	7.66877
2	conjunction	2	25	acorn_blue	-8.6	-0.2	9.3	20985	10.8706
2	conjunction	2	26	walnut_red	-3.3	-0.4	9.2	6083	5.30094
2	conjunction	2	27	walnut_red	-2	-0.3	10.7	2701	1.98494
2	conjunction	2	28	acorn_blue	0.1	-0.4	7.1	5079	4.16773
2	conjunction	2	29	acorn_blue	-0.3	-0.2	5.6	4176	1.55242
2	conjunction	2	30	acorn_blue	-5.2	-0.5	7.4	8446	5.22015
2	conjunction	3	1	acorn_blue	-6.2	-0.3	2.9	0	0
2	conjunction	3	2	acorn_blue	-9.3	-0.1	10.9	9550	8.57963
2	conjunction	3	3	walnut_red	-7.9	-0.1	11.9	1383	1.72047
2	conjunction	3	4	acorn_blue	-6.2	0	13.5	2168	2.33452
2	conjunction	3	5	walnut_red	-1.8	0.3	16.7	12683	5.44059
2	conjunction	3	6	walnut_red	3.8	0.5	16.5	7756	5.60357
2	conjunction	3	7	acorn_blue	6	0.1	12.7	5029	4.3909
2	conjunction	3	8	acorn_blue	6.4	-0.1	10.9	1616	1.84391
2	conjunction	3	9	acorn_blue	8.5	-0.1	7.8	6433	3.74433
2	conjunction	3	10	walnut_red	14.3	0.2	5.5	9284	6.23939
2	conjunction	3	11	walnut_red	17.4	0.4	5.2	2584	3.11448
2	conjunction	3	12	acorn_blue	16.9	0.4	0.8	4900	4.42832
2	conjunction	3	13	walnut_red	15.9	0.3	-0.9	1666	1.97231
2	conjunction	3	14	walnut_red	17.6	0.6	-2.3	2842	2.20227
2	conjunction	3	15	acorn_blue	14.2	0.1	-6.8	6777	5.64004
2	conjunction	3	16	acorn_blue	10.9	-0.3	-7.6	2849	3.39559
2	conjunction	3	17	walnut_red	8.1	-0.3	-9.1	2700	3.17648
2	conjunction	3	18	walnut_red	4.9	-0.1	-9.8	7084	3.27567
2	conjunction	3	19	acorn_blue	3.3	-0.1	-9.2	2750	1.7088
2	conjunction	3	20	acorn_blue	2.2	-0.2	-6.2	3718	3.19531
2	conjunction	3	21	walnut_red	0.7	-0.3	-6.4	7349	1.51327
2	conjunction	3	22	acorn_blue	-2.6	-0.3	-5.6	4219	3.39559
2	conjunction	3	23	walnut_red	-6.1	-0.3	-10.1	6464	5.70088
2	conjunction	3	24	acorn_blue	-6.9	0.1	-13.9	3119	3.8833
2	conjunction	3	25	acorn_blue	-10.6	-0.2	-7	11216	7.82943
2	conjunction	3	26	walnut_red	-13	0	-4.5	2885	3.46554
2	conjunction	3	27	acorn_blue	-18.3	0.4	4.1	8583	10.102
2	conjunction	3	28	walnut_red	-16.4	0.3	7.5	3550	3.89487
2	conjunction	3	29	acorn_blue	-13.7	0.1	9.1	11056	3.13847
2	conjunction	3	30	walnut_red	-11	0	8.9	4395	2.7074
2	conjunction	4	1	acorn_blue	-4.4	0	2.4	0	0
2	conjunction	4	2	acorn_blue	-6.2	-0.3	2.9	2683	1.86815
2	conjunction	4	3	walnut_red	-7.6	-0.4	6	4834	3.40147
2	conjunction	4	4	walnut_red	-8.6	-0.2	9.3	4067	3.44819
2	conjunction	4	5	acorn_blue	-7.9	-0.1	11.9	3200	2.69258
2	conjunction	4	6	walnut_red	-6.2	0	13.5	7250	2.33452
2	conjunction	4	7	walnut_red	-4.5	0	15.6	5827	2.70185
2	conjunction	4	8	walnut_red	-0.7	0.5	18.6	4834	4.84149
2	conjunction	4	9	acorn_blue	3.8	0.5	16.5	6351	4.96588
2	conjunction	4	10	acorn_blue	6.4	-0.1	10.9	6766	6.17414
2	conjunction	4	11	acorn_blue	6.3	-0.4	5.4	6500	5.50091
2	conjunction	4	12	walnut_red	5	-0.4	5.1	1569	1.33417
2	conjunction	4	13	walnut_red	3.6	0.3	1.9	5390	3.49285
2	conjunction	4	14	walnut_red	7.6	-0.5	-1.7	10109	5.38145
2	conjunction	4	15	acorn_blue	6.8	-0.6	-3.3	2567	1.78885
2	conjunction	4	16	acorn_blue	2.2	-0.2	-6.2	7083	5.43783
2	conjunction	4	17	walnut_red	3.3	-0.1	-9.2	5184	3.19531
2	conjunction	4	18	acorn_blue	4.9	-0.1	-9.8	2666	1.7088
2	conjunction	4	19	walnut_red	7.6	0.1	-15.3	8091	6.12699
2	conjunction	4	20	walnut_red	10.6	0	-13.7	4547	3.4
2	conjunction	4	21	acorn_blue	11.4	-0.2	-5.2	9485	8.53756
2	conjunction	4	22	walnut_red	14.7	0.4	-3.6	8429	3.66742
2	conjunction	4	23	acorn_blue	14.8	0.2	-9	5551	5.40093
2	conjunction	4	24	acorn_blue	13.5	0.1	-7.7	4450	1.83848
2	conjunction	4	25	walnut_red	16.2	0.5	-6.7	4390	2.87924
2	conjunction	4	26	walnut_red	3.7	0	-14.1	17212	14.5262
2	conjunction	4	27	acorn_blue	-1.8	-0.2	-9.3	9384	7.3
2	conjunction	4	28	walnut_red	-1.9	-0.1	-4.1	6317	5.20096
2	conjunction	4	29	walnut_red	-2.8	0.4	-0.8	5982	3.42053
2	conjunction	4	30	acorn_blue	-5.9	-0.5	5.4	10370	6.93181
2	conjunction	5	1	walnut_red	-2.1	0.3	2.8	0	0
2	conjunction	5	2	walnut_red	0.1	0.1	4.1	8931	2.55539
2	conjunction	5	3	walnut_red	-0.3	-0.2	5.6	1866	1.55242
2	conjunction	5	4	walnut_red	0.1	-0.4	7.1	2623	1.55242
2	conjunction	5	5	walnut_red	1.8	-0.4	7.5	2628	1.74642
2	conjunction	5	6	acorn_blue	4.7	-0.1	11.5	5699	4.94065
2	conjunction	5	7	acorn_blue	7.8	0.3	13.3	7686	3.58469
2	conjunction	5	8	walnut_red	3.6	0.5	18.4	6082	6.60681
2	conjunction	5	9	acorn_blue	2.6	0.4	15.8	6567	2.78568
2	conjunction	5	10	acorn_blue	-3	-0.5	6.9	12034	10.5152
2	conjunction	5	11	walnut_red	-3.9	-0.4	5.5	3450	1.66433
2	conjunction	5	12	acorn_blue	-5.9	-0.5	5.4	3668	2.0025
2	conjunction	5	13	walnut_red	-6.9	-0.3	7.7	6466	2.50799
2	conjunction	5	14	acorn_blue	-2	-0.3	10.7	5734	5.74543
2	conjunction	5	15	walnut_red	8.1	0	10.2	17634	10.1124
2	conjunction	5	16	acorn_blue	8.5	-0.1	7.8	3506	2.43311
2	conjunction	5	17	walnut_red	6.2	-0.6	-4.6	11512	12.6115
2	conjunction	5	18	walnut_red	8.1	-0.3	-9.1	3950	4.88467
2	conjunction	5	19	walnut_red	8.9	-0.2	-10.8	1599	1.87883
2	conjunction	5	20	acorn_blue	10.6	-0.2	-10.5	3018	1.72627
2	conjunction	5	21	walnut_red	11.3	-0.2	-9.9	833	0.921954
2	conjunction	5	22	walnut_red	11.4	-0.1	-11.8	4634	1.90263
2	conjunction	5	23	acorn_blue	7.6	0.1	-15.3	5583	5.16624
2	conjunction	5	24	walnut_red	5.3	0.2	-17	6051	2.86007
2	conjunction	5	25	acorn_blue	4	0.1	-15.6	3050	1.9105
2	conjunction	5	26	walnut_red	0.8	0.2	-17	6134	3.49285
2	conjunction	5	27	acorn_blue	1.2	0.3	-18.6	2750	1.64924
2	conjunction	5	28	acorn_blue	12.9	0	-11.7	15036	13.5831
2	conjunction	5	29	walnut_red	10.3	-0.3	2.3	15032	14.2394
2	conjunction	5	30	walnut_red	16.9	0.4	2.8	9123	6.61891
3	feature	1	1	acorn_blue	-2.9	0.3	1.7	0	0
3	feature	1	2	acorn_red	-4.4	0	2.4	4083	1.65529
3	feature	1	3	acorn_red	-5.9	-0.5	5.4	8101	3.3541
3	feature	1	4	acorn_blue	-5.2	-0.5	7.4	3320	2.11896
3	feature	1	5	acorn_blue	-3.3	-0.4	9.2	4331	2.61725
3	feature	1	6	acorn_red	-1.6	-0.5	7.7	4867	2.26716
3	feature	1	7	acorn_blue	-1	0.1	4	4466	3.74833
3	feature	1	8	acorn_red	-2.1	0.3	2.8	2750	1.62788
3	feature	1	9	acorn_red	0.1	0.1	4.1	6384	2.55539
3	feature	1	10	acorn_red	0.6	0.5	3	3401	1.2083
3	feature	1	11	acorn_blue	2.3	0.5	2.5	3450	1.772
3	feature	1	12	acorn_red	4.3	-0.1	3.9	4520	2.44131
3	feature	1	13	acorn_blue	6.3	-0.4	5.4	1914	2.5
3	feature	1	14	acorn_red	5	-0.4	5.1	4316	1.33417
3	feature	1	15	acorn_blue	4	-0.5	7	3505	2.14709
3	feature	1	16	acorn_blue	1.8	-0.4	7.5	3012	2.2561
3	feature	1	17	acorn_blue	-3	-0.5	6.9	8569	4.83735
3	feature	1	18	acorn_red	-6.9	-0.3	7.7	5400	3.98121
3	feature	1	19	acorn_blue	-8.7	-0.2	7	1832	1.93132
3	feature	1	20	acorn_blue	-9.3	-0.4	-2.7	15251	9.71854
3	feature	1	21	acorn_red	-8.8	-0.3	-3.9	2583	1.3
3	feature	1	22	acorn_red	-8.1	-0.3	-5.3	1284	1.56525
3	feature	1	23	acorn_blue	-7.7	-0.2	-6.5	1116	1.26491
3	feature	1	24	acorn_red	-9.2	-0.1	-5.9	6118	1.61555
3	feature	1	25	acorn_blue	-9.8	-0.2	-4.7	2283	1.34164
3	feature	1	26	acorn_blue	-12.7	0	-6	7067	3.17805
3	feature	1	27	acorn_red	-15.4	0.2	-5.1	4167	2.84605
3	feature	1	28	acorn_red	-17.5	0.3	-3.3	3553	2.76586
3	feature	1	29	acorn_blue	-18	0.4	-1.3	3349	2.06155
3	feature	1	30	acorn_blue	-17	0.3	2.4	5265	3.83275
3	feature	2	1	acorn_blue	-1.6	0.5	-1.5	0	0
3	feature	2	2	acorn_red	-2.5	0.4	-1.9	2900	0.984886
3	feature	2	3	acorn_blue	-2.8	0.4	-0.8	2972	1.14018
3	feature	2	4	acorn_red	-1.2	0.4	-2.9	7213	2.64008
3	feature	2	5	acorn_blue	-0.3	-0.2	-5.1	9016	2.37697
3	feature	2	6	acorn_red	-1	-0.4	-6.4	3088	1.47648
3	feature	2	7	acorn_red	-3.9	-0.1	-9.5	11280	4.245
3	feature	2	8	acorn_blue	-4.8	-0.1	-11.1	2951	1.83576
3	feature	2	9	acorn_red	-5.8	-0.1	-12.7	3233	1.8868
3	feature	2	10	acorn_blue	-7.1	-0.2	-9.4	7450	3.54683
3	feature	2	11	acorn_blue	-6.1	-0.3	-10.1	4601	1.22066
3	feature	2	12	acorn_blue	-8.9	-0.1	-7.2	8583	4.03113
3	feature	2	13	acorn_red	-9.8	-0.2	-4.7	5851	2.65707
3	feature	2	14	acorn_red	-11.3	-0.1	-4.3	3233	1.55242
3	feature	2	15	acorn_blue	-12.7	0	-6	2885	2.20227
3	feature	2	16	acorn_red	-13	0	-4.5	4732	1.52971
3	feature	2	17	acorn_red	-15	0.2	-3.7	3318	2.15407
3	feature	2	18	acorn_red	-15.4	0.2	-5.1	3767	1.45602
3	feature	2	19	acorn_red	-15.3	0.2	-8.2	4832	3.10161
3	feature	2	20	acorn_blue	-14.4	0.1	-9.3	2536	1.42127
3	feature	2	21	acorn_blue	-13.9	0.2	-11.3	2767	2.06155
3	feature	2	22	acorn_blue	-11.4	0	-11.7	3331	2.5318
3	feature	2	23	acorn_red	-11.8	0.2	-13.1	6418	1.45602
3	feature	2	24	acorn_blue	-6.6	0.3	-16.5	32507	6.21289
3	feature	2	25	acorn_red	1.2	0.3	-18.6	11664	8.07775
3	feature	2	26	acorn_red	2.4	0.3	-17.8	2597	1.44222
3	feature	2	27	acorn_red	3.7	0.3	-17.8	2705	1.3
3	feature	2	28	acorn_blue	4	0.1	-15.6	6765	2.22036
3	feature	2	29	acorn_blue	3.7	0	-14.1	1331	1.52971
3	feature	2	30	acorn_blue	2.6	-0.2	-10.5	2900	3.76431
3	feature	3	1	acorn_blue	-2.8	0.4	-0.8	0	0
3	feature	3	2	acorn_red	-2.5	0.4	-1.9	2901	1.14018
3	feature	3	3	acorn_red	-1.2	0.4	-2.9	2470	1.64012
3	feature	3	4	acorn_red	1.2	0.4	-2.7	3231	2.40832
3	feature	3	5	acorn_blue	1.8	0.3	-2.7	518	0.6
3	feature	3	6	acorn_red	2.8	0.1	-3.8	2814	1.48661
3	feature	3	7	acorn_blue	0.7	-0.3	-6.4	5168	3.34215
3	feature	3	8	acorn_red	-1	-0.4	-6.4	2436	1.7
3	feature	3	9	acorn_blue	-0.3	-0.2	-5.1	3098	1.47648
3	feature	3	10	acorn_blue	-1.8	-0.2	-9.3	9050	4.45982
3	feature	3	11	acorn_blue	-0.4	0	-10.8	2687	2.05183
3	feature	3	12	acorn_blue	3.3	-0.1	-9.2	6282	4.03113
3	feature	3	13	acorn_red	6.8	-0.6	-3.3	9248	6.86003
3	feature	3	14	acorn_red	5.6	-0.2	-1.4	2567	2.24722
3	feature	3	15	acorn_blue	6.3	-0.3	0	2800	1.56525
3	feature	3	16	acorn_blue	9.4	-0.4	-1.6	4486	3.48855
3	feature	3	17	acorn_blue	8.2	-0.5	-2.8	3398	1.69706
3	feature	3	18	acorn_red	10	-0.4	0.5	6068	3.75899
3	feature	3	19	acorn_red	10.3	-0.3	2.3	1382	1.82483
3	feature	3	20	acorn_red	10.5	-0.1	3.4	1978	1.11803
3	feature	3	21	acorn_blue	11.4	0	5.9	5173	2.65707
3	feature	3	22	acorn_red	13.4	0.2	8.2	2633	3.04795
3	feature	3	23	acorn_red	15.9	0.4	9.9	2319	3.02324
3	feature	3	24	acorn_blue	15.8	0.3	7.2	5671	2.70185
3	feature	3	25	acorn_red	17.4	0.4	5.2	2163	2.56125
3	feature	3	26	acorn_red	16.9	0.4	0.8	11115	4.42832
3	feature	3	27	acorn_red	15.9	0.3	-0.9	3138	1.97231
3	feature	3	28	acorn_blue	17.6	0.6	-2.3	3912	2.20227
3	feature	3	29	acorn_blue	15.9	0.4	-7.8	8401	5.75674
3	feature	3	30	acorn_blue	16.2	0.5	-6.7	3401	1.14018
3	feature	4	1	acorn_blue	-2.9	0.3	1.7	0	0
3	feature	4	2	acorn_blue	-4.4	0	2.4	2352	1.65529
3	feature	4	3	acorn_blue	-4	0.1	0.6	4081	1.84391
3	feature	4	4	acorn_red	-2.8	0.4	-0.8	1416	1.84391
3	feature	4	5	acorn_blue	-1.6	0.5	-1.5	1099	1.38924
3	feature	4	6	acorn_blue	-1.2	0.4	-2.9	4184	1.45602
3	feature	4	7	acorn_red	-0.3	-0.2	-5.1	3384	2.37697
3	feature	4	8	acorn_red	0.7	-0.3	-6.4	1432	1.64012
3	feature	4	9	acorn_red	2.2	-0.2	-6.2	1268	1.51327
3	feature	4	10	acorn_red	1.2	0	-4.5	3649	1.97231
3	feature	4	11	acorn_blue	2.8	0.1	-3.8	3904	1.74642
3	feature	4	12	acorn_red	4.4	-0.2	-3.2	1380	1.7088
3	feature	4	13	acorn_blue	6.8	-0.6	-3.3	2343	2.40208
3	feature	4	14	acorn_red	8	-0.5	-4.9	2902	2
3	feature	4	15	acorn_red	9.5	-0.3	-9	6297	4.36578
3	feature	4	16	acorn_red	10.6	-0.2	-10.5	2285	1.86011
3	feature	4	17	acorn_red	10.6	-0.1	-11.8	2233	1.3
3	feature	4	18	acorn_blue	13.2	0.1	-12.6	5417	2.72029
3	feature	4	19	acorn_blue	12.9	0	-11.7	2666	0.948683
3	feature	4	20	acorn_blue	8.9	-0.2	-10.8	4403	4.1
3	feature	4	21	acorn_blue	4.9	-0.1	-9.8	8033	4.12311
3	feature	4	22	acorn_blue	5	0	-11.8	5181	2.0025
3	feature	4	23	acorn_red	6.4	0	-12	3668	1.41421
3	feature	4	24	acorn_red	3.9	-0.1	-11.9	4951	2.502
3	feature	4	25	acorn_blue	3.7	0	-14.1	3583	2.20907
3	feature	4	26	acorn_blue	4	0.1	-15.6	1182	1.52971
3	feature	4	27	acorn_red	3.7	0.3	-17.8	1935	2.22036
3	feature	4	28	acorn_red	2.4	0.3	-17.8	3266	1.3
3	feature	4	29	acorn_red	1.2	0.3	-18.6	2384	1.44222
3	feature	4	30	acorn_blue	-6.9	0.1	-13.9	14050	9.36483
3	feature	5	1	acorn_red	-4	0.1	0.6	0	0
3	feature	5	2	acorn_blue	-4.4	0	2.4	3967	1.84391
3	feature	5	3	acorn_red	-6.2	-0.3	2.9	4218	1.86815
3	feature	5	4	acorn_blue	-7.6	-0.4	6	4616	3.40147
3	feature	5	5	acorn_red	-6.9	-0.3	7.7	2671	1.83848
3	feature	5	6	acorn_red	-6.2	-0.1	10	2014	2.40416
3	feature	5	7	acorn_red	-4.9	-0.1	11.5	1532	1.98494
3	feature	5	8	acorn_blue	-5.2	-0.5	7.4	8217	4.11096
3	feature	5	9	acorn_red	-5.9	-0.5	5.4	2633	2.11896
3	feature	5	10	acorn_blue	-11.7	-0.3	3.6	6918	6.07289
3	feature	5	11	acorn_red	-18	0.4	-1.3	6650	7.98123
3	feature	5	12	acorn_blue	-17.5	0.3	-3.3	2020	2.06155
3	feature	5	13	acorn_red	-13	0	-4.5	5264	4.65725
3	feature	5	14	acorn_blue	-11.3	-0.1	-4.3	1450	1.71172
3	feature	5	15	acorn_blue	-9.3	-0.4	-2.7	3633	2.56125
3	feature	5	16	acorn_red	-8.8	-0.3	-3.9	6420	1.3
3	feature	5	17	acorn_red	-8.1	-0.3	-5.3	2497	1.56525
3	feature	5	18	acorn_blue	-1.8	-0.2	-9.3	8460	7.46257
3	feature	5	19	acorn_red	-0.4	0	-10.8	5277	2.05183
3	feature	5	20	acorn_blue	-3	-0.1	-11.2	2549	2.63059
3	feature	5	21	acorn_red	-3.9	0	-13.2	3435	2.19317
3	feature	5	22	acorn_red	-4.8	-0.1	-11.1	5116	2.28473
3	feature	5	23	acorn_blue	-6.1	-0.3	-10.1	1799	1.64012
3	feature	5	24	acorn_blue	-7.1	-0.2	-9.4	2849	1.22066
3	feature	5	25	acorn_red	-11.4	0	-11.7	6305	4.87647
3	feature	5	26	acorn_blue	-13.9	0.2	-11.3	3632	2.5318
3	feature	5	27	acorn_blue	-15.4	0.2	-9.6	3064	2.26716
3	feature	5	28	acorn_red	-15.3	0.2	-8.2	2350	1.40357
3	feature	5	29	acorn_blue	-16.8	0.3	-7.8	3334	1.55242
3	feature	5	30	acorn_blue	-9.1	0.2	-14	17052	9.88585
3	conjunction	1	1	acorn_blue	-2.9	0.3	1.7	0	0
3	conjunction	1	2	walnut_red	-5.5	-0.2	-0.8	8083	3.60694
3	conjunction	1	3	walnut_red	-5	-0.1	-1.8	957	1.11803
3	conjunction	1	4	acorn_blue	-1.8	-0.2	-9.3	8612	8.15414
3	conjunction	1	5	walnut_red	-2.1	0.2	-13.9	8568	4.60977
3	conjunction	1	6	acorn_blue	1.5	0.3	-15.7	7100	4.02492
3	conjunction	1	7	acorn_blue	4	0.1	-15.6	2182	2.502
3	conjunction	1	8	walnut_red	3.6	0.2	-16.7	4000	1.17047
3	conjunction	1	9	walnut_red	2.4	0.3	-17.8	2352	1.62788
3	conjunction	1	10	acorn_blue	-3.9	0	-13.2	22550	7.80064
3	conjunction	1	11	walnut_red	-7.1	-0.2	-9.4	11919	4.9679
3	conjunction	1	12	acorn_blue	-10.6	-0.2	-7	4631	4.24382
3	conjunction	1	13	acorn_blue	-12.7	0	-6	5119	2.32594
3	conjunction	1	14	walnut_red	-9.2	-0.1	-5.9	3281	3.50143
3	conjunction	1	15	walnut_red	-13	0	-4.5	6551	4.04969
3	conjunction	1	16	acorn_blue	-11.9	-0.1	-2	6668	2.7313
3	conjunction	1	17	walnut_red	-17	0.3	2.4	14000	6.73573
3	conjunction	1	18	walnut_red	-18.3	0.4	4.1	7100	2.14009
3	conjunction	1	19	acorn_blue	-16.4	0.3	7.5	4417	3.89487
3	conjunction	1	20	acorn_blue	-13.4	0	3.5	13901	5
3	conjunction	1	21	walnut_red	-5.9	-0.5	5.4	13983	7.73692
3	conjunction	1	22	acorn_blue	-3.9	-0.4	5.5	1901	2.0025
3	conjunction	1	23	walnut_red	-3.3	-0.4	9.2	9501	3.74833
3	conjunction	1	24	walnut_red	-4.9	-0.1	11.5	2367	2.80179
3	conjunction	1	25	acorn_blue	-6.2	0	13.5	1950	2.38537
3	conjunction	1	26	walnut_red	-10.6	0.1	13.6	4916	4.40114
3	conjunction	1	27	acorn_blue	-12	0.2	11.8	2972	2.28035
3	conjunction	1	28	walnut_red	2.8	-0.2	10.3	26118	14.8758
3	conjunction	1	29	walnut_red	4.7	0.3	14.7	5395	4.7927
3	conjunction	1	30	walnut_red	10.4	0.3	12.2	7285	6.22415
3	conjunction	2	1	walnut_red	-1.6	0.5	-1.5	0	0
3	conjunction	2	2	walnut_red	-0.3	-0.2	-5.1	7985	3.82753
3	conjunction	2	3	acorn_blue	-1	-0.4	-6.4	1232	1.47648
3	conjunction	2	4	acorn_blue	-2.6	-0.3	-5.6	4439	1.78885
3	conjunction	2	5	acorn_blue	-2.5	0.4	-1.9	10751	3.70135
3	conjunction	2	6	walnut_red	-4	0.1	0.6	3428	2.91548
3	conjunction	2	7	acorn_blue	-4.4	0	2.4	2800	1.84391
3	conjunction	2	8	walnut_red	-6.7	-0.4	4.1	2373	2.86007
3	conjunction	2	9	walnut_red	-5.9	-0.5	5.4	4195	1.52643
3	conjunction	2	10	acorn_blue	-5.2	-0.5	7.4	2735	2.11896
3	conjunction	2	11	walnut_red	-6.9	-0.3	7.7	4033	1.72627
3	conjunction	2	12	walnut_red	-8.7	-0.2	7	1618	1.93132
3	conjunction	2	13	acorn_blue	-11	0	8.9	4623	2.98329
3	conjunction	2	14	acorn_blue	-13.7	0.1	9.1	2160	2.7074
3	conjunction	2	15	walnut_red	-13.4	0	3.5	10220	5.60803
3	conjunction	2	16	walnut_red	1.8	-0.4	7.5	18263	15.7175
3	conjunction	2	17	acorn_blue	5	-0.4	5.1	5484	4
3	conjunction	2	18	acorn_blue	8.5	-0.1	7.8	7722	4.42041
3	conjunction	2	19	walnut_red	6.4	-0.1	10.9	5730	3.74433
3	conjunction	2	20	acorn_blue	2.6	0.4	15.8	5182	6.20081
3	conjunction	2	21	walnut_red	1.5	0.3	14.6	3533	1.62788
3	conjunction	2	22	acorn_blue	0.5	0.1	12.9	3633	1.97231
3	conjunction	2	23	walnut_red	13.4	0.2	8.2	25319	13.7295
3	conjunction	2	24	acorn_blue	15.9	0.4	9.9	2417	3.02324
3	conjunction	2	25	walnut_red	11.4	0	5.9	8250	6.0208
3	conjunction	2	26	acorn_blue	14.3	0.2	5.5	12051	2.92746
3	conjunction	2	27	walnut_red	14.1	0	3	4951	2.50799
3	conjunction	2	28	walnut_red	15.9	0.3	-0.9	5717	4.29535
3	conjunction	2	29	acorn_blue	16.9	0.4	0.8	3172	1.97231
3	conjunction	2	30	acorn_blue	12.3	0	-3.3	12839	6.16198
3	conjunction	3	1	acorn_blue	-4	0.1	0.6	0	0
3	conjunction	3	2	acorn_blue	-5.5	-0.2	-0.8	1550	2.05183
3	conjunction	3	3	walnut_red	-8.1	-0.3	-5.3	4017	5.19711
3	conjunction	3	4	acorn_blue	-9.2	-0.1	-5.9	2571	1.253
3	conjunction	3	5	walnut_red	-8.9	-0.1	-7.2	2896	1.33417
3	conjunction	3	6	acorn_blue	-11.3	-0.1	-4.3	5618	3.76431
3	conjunction	3	7	walnut_red	-13	0	-4.5	2456	1.71172
3	conjunction	3	8	acorn_blue	-12.7	0	-6	3044	1.52971
3	conjunction	3	9	walnut_red	-16	0.3	-6.3	7450	3.31361
3	conjunction	3	10	acorn_blue	-18.3	0.4	4.1	16018	10.6513
3	conjunction	3	11	acorn_blue	-16	0.2	5.4	4222	2.64197
3	conjunction	3	12	walnut_red	-14.4	0.1	6.6	1644	2
3	conjunction	3	13	acorn_blue	-11	0	8.9	3235	4.10488
3	conjunction	3	14	acorn_blue	-8.6	-0.2	9.3	2015	2.43311
3	conjunction	3	15	acorn_blue	-4.9	-0.1	11.5	4768	4.30465
3	conjunction	3	16	walnut_red	-6.2	0	13.5	3300	2.38537
3	conjunction	3	17	walnut_red	-7	0.2	16.1	2368	2.72029
3	conjunction	3	18	walnut_red	-6.2	-0.1	10	10266	6.15224
3	conjunction	3	19	walnut_red	-6.9	-0.3	7.7	3084	2.40416
3	conjunction	3	20	acorn_blue	-6.7	-0.4	4.1	3737	3.60555
3	conjunction	3	21	walnut_red	-5.3	-0.1	1.8	7879	2.69258
3	conjunction	3	22	walnut_red	-2.1	0.3	2.8	4967	3.35261
3	conjunction	3	23	acorn_blue	-0.3	-0.2	5.6	4485	3.32866
3	conjunction	3	24	acorn_blue	1.8	-0.4	7.5	3252	2.83196
3	conjunction	3	25	acorn_blue	-3	-0.5	6.9	10897	4.83735
3	conjunction	3	26	walnut_red	-3.3	-0.4	9.2	6518	2.31948
3	conjunction	3	27	walnut_red	4	-0.5	7	8769	7.6243
3	conjunction	3	28	walnut_red	7.4	-0.2	8.2	2951	3.60555
3	conjunction	3	29	walnut_red	4.7	-0.3	10.2	7181	3.36006
3	conjunction	3	30	acorn_blue	2.8	-0.2	10.3	1519	1.90263
3	conjunction	4	1	walnut_red	-2.9	0.3	1.7	0	0
3	conjunction	4	2	walnut_red	-4.4	0	2.4	1654	1.65529
3	conjunction	4	3	acorn_blue	-4	0.1	0.6	4347	1.84391
3	conjunction	4	4	acorn_blue	-5	-0.1	-1.8	3354	2.6
3	conjunction	4	5	walnut_red	-8.8	-0.3	-3.9	5463	4.34166
3	conjunction	4	6	acorn_blue	-8.1	-0.3	-5.3	4200	1.56525
3	conjunction	4	7	walnut_red	-3.9	-0.1	-9.5	6602	5.9397
3	conjunction	4	8	acorn_blue	-3	-0.1	-11.2	1564	1.92354
3	conjunction	4	9	walnut_red	-1.5	0	-12	1401	1.7
3	conjunction	4	10	acorn_blue	3.9	-0.1	-11.9	5834	5.40093
3	conjunction	4	11	acorn_blue	5.3	0.2	-17	14151	5.28867
3	conjunction	4	12	walnut_red	6.5	0.2	-16.2	3734	1.44222
3	conjunction	4	13	acorn_blue	7.6	0.1	-15.3	1087	1.42127
3	conjunction	4	14	walnut_red	10.6	-0.1	-11.8	3929	4.60977
3	conjunction	4	15	walnut_red	10.6	-0.2	-10.5	3288	1.3
3	conjunction	4	16	walnut_red	11.3	-0.2	-9.9	2129	0.921954
3	conjunction	4	17	walnut_red	8.1	-0.3	-9.1	4916	3.29848
3	conjunction	4	18	walnut_red	2.8	0.1	-3.8	7421	7.49533
3	conjunction	4	19	acorn_blue	1.8	0.3	-2.7	2447	1.48661
3	conjunction	4	20	walnut_red	-1.2	0.4	-2.9	8917	3.00666
3	conjunction	4	21	acorn_blue	-13.4	0	3.5	19368	13.7768
3	conjunction	4	22	walnut_red	-15	0.2	-3.7	8967	7.37564
3	conjunction	4	23	walnut_red	-12.7	0	-6	2872	3.25269
3	conjunction	4	24	walnut_red	-7.1	-0.2	-9.4	8829	6.55134
3	conjunction	4	25	acorn_blue	-17.5	0.3	-3.3	30418	12.0569
3	conjunction	4	26	acorn_blue	-9.7	0.3	-15.6	24835	14.5647
3	conjunction	4	27	acorn_blue	2.4	0.3	-17.8	16186	12.2984
3	conjunction	4	28	walnut_red	1.5	0.3	-15.7	4682	2.28473
3	conjunction	4	29	acorn_blue	0.7	-0.3	-6.4	13267	9.33435
3	conjunction	4	30	walnut_red	10	-0.4	0.5	36069	11.5802
3	conjunction	5	1	acorn_blue	-2.9	0.3	1.7	0	0
3	conjunction	5	2	walnut_red	-2.1	0.3	2.8	2284	1.36015
3	conjunction	5	3	acorn_blue	-1	0.1	4	2154	1.62788
3	conjunction	5	4	acorn_blue	-1.6	-0.5	7.7	5678	3.74833
3	conjunction	5	5	walnut_red	-7.6	-0.4	6	7268	6.23618
3	conjunction	5	6	acorn_blue	-11.7	-0.3	3.6	3787	4.75079
3	conjunction	5	7	walnut_red	-15.2	0.1	3	4913	3.55106
3	conjunction	5	8	acorn_blue	-11	0	8.9	10256	7.24224
3	conjunction	5	9	walnut_red	-9.3	-0.1	10.9	2111	2.62488
3	conjunction	5	10	walnut_red	-8.7	-0.2	7	8818	3.94588
3	conjunction	5	11	walnut_red	-6.7	-0.4	4.1	6433	3.52278
3	conjunction	5	12	walnut_red	-5	-0.1	-1.8	18473	6.14003
3	conjunction	5	13	acorn_blue	-8.1	-0.3	-5.3	6979	4.67547
3	conjunction	5	14	walnut_red	-9.2	-0.1	-5.9	1901	1.253
3	conjunction	5	15	acorn_blue	-9.8	-0.2	-4.7	2904	1.34164
3	conjunction	5	16	walnut_red	-9.3	-0.4	-2.7	3662	2.06155
3	conjunction	5	17	walnut_red	-13	0	-4.5	9785	4.11461
3	conjunction	5	18	walnut_red	-16	0.3	-6.3	8453	3.49857
3	conjunction	5	19	acorn_blue	-15.4	0.2	-5.1	10381	1.34164
3	conjunction	5	20	walnut_red	-17	0.3	2.4	15916	7.66877
3	conjunction	5	21	acorn_blue	-5.3	-0.1	1.8	13002	11.7154
3	conjunction	5	22	acorn_blue	-8.6	-0.2	9.3	14352	8.1939
3	conjunction	5	23	acorn_blue	-13.7	0.1	9.1	10849	5.10392
3	conjunction	5	24	acorn_blue	-4.5	0	15.6	20185	11.2645
3	conjunction	5	25	walnut_red	-1.8	0.3	16.7	2634	2.91548
3	conjunction	5	26	walnut_red	2.6	0.4	15.8	8233	4.4911
3	conjunction	5	27	acorn_blue	4.7	0.3	14.7	2983	2.37065
3	conjunction	5	28	walnut_red	4.7	-0.1	11.5	4466	3.2
3	conjunction	5	29	walnut_red	5	-0.4	7.6	8452	3.91152
3	conjunction	5	30	walnut_red	4	-0.5	7	4650	1.16619
4	feature	1	1	acorn_blue	-4	0.1	0.6	0	0
4	feature	1	2	acorn_red	-5.5	-0.2	-0.8	4268	2.05183
4	feature	1	3	acorn_red	-5	-0.1	-1.8	2351	1.11803
4	feature	1	4	acorn_blue	-1.8	-0.2	-9.3	9933	8.15414
4	feature	1	5	acorn_red	-0.4	0	-10.8	2431	2.05183
4	feature	1	6	acorn_blue	2.6	-0.2	-10.5	4385	3.01496
4	feature	1	7	acorn_blue	3.3	-0.1	-9.2	3017	1.47648
4	feature	1	8	acorn_blue	2.2	-0.2	-6.2	4384	3.19531
4	feature	1	9	acorn_red	0.7	-0.3	-6.4	2766	1.51327
4	feature	1	10	acorn_red	-1	-0.4	-6.4	2286	1.7
4	feature	1	11	acorn_red	-3.9	-0.1	-9.5	7021	4.245
4	feature	1	12	acorn_blue	-6.1	-0.3	-10.1	4461	2.28035
4	feature	1	13	acorn_blue	-7.1	-0.2	-9.4	2950	1.22066
4	feature	1	14	acorn_blue	-9.4	0	-12.5	9468	3.86005
4	feature	1	15	acorn_red	-5.8	-0.1	-12.7	6649	3.60555
4	feature	1	16	acorn_blue	-6.6	0.3	-16.5	7252	3.8833
4	feature	1	17	acorn_red	-7.4	0.2	-15.6	5739	1.20416
4	feature	1	18	acorn_blue	-9.7	0.3	-15.6	4979	2.3
4	feature	1	19	acorn_blue	-11.8	0.2	-13.1	5400	3.26497
4	feature	1	20	acorn_red	-8.9	-0.1	-7.2	10621	6.57419
4	feature	1	21	acorn_blue	-9.2	-0.1	-5.9	4379	1.33417
4	feature	1	22	acorn_red	-8.1	-0.3	-5.3	3453	1.253
4	feature	1	23	acorn_blue	-7.6	-0.4	6	11384	11.3111
4	feature	1	24	acorn_red	-5.9	-0.5	5.4	5281	1.80278
4	feature	1	25	acorn_blue	-6.7	-0.4	4.1	5884	1.52643
4	feature	1	26	acorn_blue	-8.6	-0.2	9.3	6917	5.53624
4	feature	1	27	acorn_red	-9.3	-0.1	10.9	1366	1.74642
4	feature	1	28	acorn_blue	-10.6	0.1	13.6	2269	2.99666
4	feature	1	29	acorn_red	-12	0.3	13.8	3966	1.41421
4	feature	1	30	acorn_blue	-15.8	0.2	10.5	7351	5.03289
4	feature	2	1	acorn_blue	-4	0.1	0.6	0	0
4	feature	2	2	acorn_blue	-5.5	-0.2	-0.8	5819	2.05183
4	feature	2	3	acorn_blue	-5	-0.1	-1.8	2683	1.11803
4	feature	2	4	acorn_red	-8.8	-0.3	-3.9	7917	4.34166
4	feature	2	5	acorn_red	-9.3	-0.4	-2.7	3599	1.3
4	feature	2	6	acorn_blue	-8.1	-0.3	-5.3	6684	2.86356
4	feature	2	7	acorn_red	-3.9	-0.1	-9.5	8104	5.9397
4	feature	2	8	acorn_blue	-3	-0.1	-11.2	3129	1.92354
4	feature	2	9	acorn_red	-1.5	0	-12	4051	1.7
4	feature	2	10	acorn_blue	-0.4	0	-10.8	3268	1.62788
4	feature	2	11	acorn_red	-1.8	-0.2	-9.3	2050	2.05183
4	feature	2	12	acorn_red	-1	-0.4	-6.4	4982	3.00832
4	feature	2	13	acorn_red	-0.3	-0.2	-5.1	1350	1.47648
4	feature	2	14	acorn_blue	1.2	0.4	-2.7	4601	2.83019
4	feature	2	15	acorn_blue	1.8	0.3	-2.7	3850	0.6
4	feature	2	16	acorn_red	2.8	0.1	-3.8	3221	1.48661
4	feature	2	17	acorn_blue	2.2	-0.2	-6.2	4079	2.47386
4	feature	2	18	acorn_blue	0.7	-0.3	-6.4	3534	1.51327
4	feature	2	19	acorn_red	-1.9	-0.1	-4.1	4683	3.47131
4	feature	2	20	acorn_red	-2.5	0.4	-1.9	3336	2.28035
4	feature	2	21	acorn_red	-2.8	0.4	-0.8	2264	1.14018
4	feature	2	22	acorn_red	-7.6	-0.4	6	10585	8.32346
4	feature	2	23	acorn_red	-6.9	-0.3	7.7	3101	1.83848
4	feature	2	24	acorn_blue	-5.2	-0.5	7.4	5051	1.72627
4	feature	2	25	acorn_red	-5.9	-0.5	5.4	4848	2.11896
4	feature	2	26	acorn_blue	-12.1	-0.1	5.9	8601	6.22013
4	feature	2	27	acorn_red	-12.5	0	7.5	3101	1.64924
4	feature	2	28	acorn_red	-12.6	0.1	9.8	1833	2.30217
4	feature	2	29	acorn_blue	-12	0.2	11.8	1650	2.08806
4	feature	2	30	acorn_red	-12	0.3	13.8	1550	2
4	feature	3	1	acorn_blue	-2.9	0.3	1.7	0	0
4	feature	3	2	acorn_blue	-4.4	0	2.4	3066	1.65529
4	feature	3	3	acorn_blue	-6.7	-0.4	4.1	4583	2.86007
4	feature	3	4	acorn_red	-7.6	-0.4	6	3384	2.10238
4	feature	3	5	acorn_red	-6.9	-0.3	7.7	5233	1.83848
4	feature	3	6	acorn_red	-2	-0.3	10.7	5541	5.74543
4	feature	3	7	acorn_red	-3.3	-0.4	9.2	5677	1.98494
4	feature	3	8	acorn_blue	-1.6	-0.5	7.7	6700	2.26716
4	feature	3	9	acorn_blue	2.7	0	11.7	15985	5.87282
4	feature	3	10	acorn_blue	6	0.1	12.7	7483	3.44819
4	feature	3	11	acorn_red	7.8	0.3	13.3	3083	1.89737
4	feature	3	12	acorn_blue	6	0.5	16.3	8435	3.49857
4	feature	3	13	acorn_red	3.6	0.5	18.4	5766	3.18904
4	feature	3	14	acorn_blue	3.8	0.5	16.5	6134	1.9105
4	feature	3	15	acorn_blue	-1.8	0.3	16.7	11818	5.60357
4	feature	3	16	acorn_red	-4.5	0	15.6	4782	2.91548
4	feature	3	17	acorn_red	-6.1	0.3	16.6	6367	1.8868
4	feature	3	18	acorn_red	-7	0.2	16.1	4185	1.02956
4	feature	3	19	acorn_red	-10.6	0.1	13.6	6583	4.38292
4	feature	3	20	acorn_red	-12	0.3	13.8	2423	1.41421
4	feature	3	21	acorn_blue	-13.2	0.2	11.8	5377	2.33238
4	feature	3	22	acorn_blue	-13.7	0.1	9.1	4451	2.74591
4	feature	3	23	acorn_blue	-12.5	0	7.5	3555	2
4	feature	3	24	acorn_red	-5.5	-0.2	-0.8	12363	10.8577
4	feature	3	25	acorn_red	-5	-0.1	-1.8	2338	1.11803
4	feature	3	26	acorn_red	-7.7	-0.2	-6.5	8745	5.42033
4	feature	3	27	acorn_red	-8.9	-0.1	-7.2	2657	1.38924
4	feature	3	28	acorn_red	-9.4	0	-12.5	8517	5.32353
4	feature	3	29	acorn_red	-9.1	0.2	-14	2361	1.52971
4	feature	3	30	acorn_red	-9.7	0.3	-15.6	4651	1.7088
4	feature	4	1	acorn_red	-2.8	0.4	-0.8	0	0
4	feature	4	2	acorn_red	-5.5	-0.2	-0.8	5533	2.7
4	feature	4	3	acorn_blue	-5	-0.1	-1.8	3200	1.11803
4	feature	4	4	acorn_red	-2.6	-0.3	-5.6	5333	4.49444
4	feature	4	5	acorn_red	-0.3	-0.2	-5.1	3417	2.35372
4	feature	4	6	acorn_red	1.2	0	-4.5	2867	1.61555
4	feature	4	7	acorn_blue	2.8	0.1	-3.8	2460	1.74642
4	feature	4	8	acorn_blue	4.4	-0.2	-3.2	2624	1.7088
4	feature	4	9	acorn_red	6.8	-0.6	-3.3	4600	2.40208
4	feature	4	10	acorn_red	6.2	-0.6	-4.6	4601	1.43178
4	feature	4	11	acorn_red	6.3	-0.2	-9.8	5884	5.20096
4	feature	4	12	acorn_red	8.1	-0.3	-9.1	4433	1.93132
4	feature	4	13	acorn_red	9.5	-0.3	-9	2634	1.40357
4	feature	4	14	acorn_red	11.3	-0.2	-9.9	3866	2.01246
4	feature	4	15	acorn_red	11.4	-0.1	-11.8	3286	1.90263
4	feature	4	16	acorn_red	10.6	-0.1	-11.8	3898	0.8
4	feature	4	17	acorn_blue	8.9	-0.2	-10.8	3033	1.97231
4	feature	4	18	acorn_blue	10.6	0	-13.7	8670	3.36155
4	feature	4	19	acorn_red	9.5	0.1	-14.6	3214	1.42127
4	feature	4	20	acorn_blue	7.6	0.1	-15.3	3152	2.02485
4	feature	4	21	acorn_blue	6.5	0.2	-16.2	1081	1.42127
4	feature	4	22	acorn_blue	5.3	0.2	-17	4449	1.44222
4	feature	4	23	acorn_red	3.7	0.3	-17.8	4919	1.78885
4	feature	4	24	acorn_blue	4	0.1	-15.6	11384	2.22036
4	feature	4	25	acorn_red	3.7	0	-14.1	2816	1.52971
4	feature	4	26	acorn_blue	2.6	-0.2	-10.5	4785	3.76431
4	feature	4	27	acorn_blue	3.3	-0.1	-9.2	2649	1.47648
4	feature	4	28	acorn_blue	0.8	-0.3	-7.4	5553	3.08058
4	feature	4	29	acorn_red	0.7	-0.3	-6.4	2531	1.00499
4	feature	4	30	acorn_blue	-1.2	0.4	-2.9	5450	3.98246
4	feature	5	1	acorn_blue	-4	0.1	0.6	0	0
4	feature	5	2	acorn_red	-5.5	-0.2	-0.8	3053	2.05183
4	feature	5	3	acorn_blue	-6.2	-0.3	2.9	7982	3.76563
4	feature	5	4	acorn_red	-5.9	-0.5	5.4	5117	2.51794
4	feature	5	5	acorn_red	-7.6	-0.4	6	2999	1.80278
4	feature	5	6	acorn_blue	-8.7	-0.2	7	2534	1.48661
4	feature	5	7	acorn_blue	-8.6	-0.2	9.3	4934	2.30217
4	feature	5	8	acorn_red	-7.9	-0.1	11.9	2149	2.69258
4	feature	5	9	acorn_red	-12	0.2	11.8	6503	4.10122
4	feature	5	10	acorn_blue	-13.7	0.1	9.1	3916	3.19061
4	feature	5	11	acorn_red	-12.5	0	7.5	4116	2
4	feature	5	12	acorn_red	-14.4	0.1	6.6	3700	2.10238
4	feature	5	13	acorn_blue	-16	0.2	5.4	2556	2
4	feature	5	14	acorn_red	-16.4	0.3	7.5	4245	2.13776
4	feature	5	15	acorn_blue	-15.2	0.1	3	10351	4.65725
4	feature	5	16	acorn_red	-15	0.2	-3.7	7368	6.70298
4	feature	5	17	acorn_blue	-13	0	-4.5	1898	2.15407
4	feature	5	18	acorn_blue	-9.8	-0.2	-4.7	4800	3.20624
4	feature	5	19	acorn_blue	-8.8	-0.3	-3.9	2149	1.28062
4	feature	5	20	acorn_blue	-8.1	-0.3	-5.3	6453	1.56525
4	feature	5	21	acorn_red	-7.7	-0.2	-6.5	2650	1.26491
4	feature	5	22	acorn_red	-7.2	-0.3	-8.2	4266	1.772
4	feature	5	23	acorn_red	-7.1	-0.2	-9.4	2000	1.20416
4	feature	5	24	acorn_red	-6.1	-0.3	-10.1	2552	1.22066
4	feature	5	25	acorn_red	-4.8	-0.1	-11.1	1570	1.64012
4	feature	5	26	acorn_blue	-3.9	-0.1	-9.5	4396	1.83576
4	feature	5	27	acorn_red	-1	-0.4	-6.4	5152	4.245
4	feature	5	28	acorn_red	-0.3	-0.2	-5.1	2381	1.47648
4	feature	5	29	acorn_red	1.2	0	-4.5	3033	1.61555
4	feature	5	30	acorn_blue	1.2	0.4	-2.7	3501	1.8
4	conjunction	1	1	walnut_red	-5.3	-0.1	1.8	0	0
4	conjunction	1	2	walnut_red	-6.2	-0.3	2.9	2651	1.42127
4	conjunction	1	3	acorn_blue	-7.6	-0.4	6	8420	3.40147
4	conjunction	1	4	walnut_red	-4.9	-0.1	11.5	7797	6.12699
4	conjunction	1	5	walnut_red	-6.1	0.3	16.6	5750	5.23927
4	conjunction	1	6	acorn_blue	0.5	0.1	12.9	15002	7.56637
4	conjunction	1	7	acorn_blue	2.8	-0.2	10.3	3983	3.47131
4	conjunction	1	8	walnut_red	4	-0.5	7	6651	3.51141
4	conjunction	1	9	walnut_red	5	-0.4	7.6	2716	1.16619
4	conjunction	1	10	walnut_red	6	0.1	12.7	8199	5.19711
4	conjunction	1	11	acorn_blue	6	0.5	16.3	2817	3.6
4	conjunction	1	12	acorn_blue	3.6	0.5	18.4	4236	3.18904
4	conjunction	1	13	walnut_red	0.8	0.5	17.1	4415	3.08707
4	conjunction	1	14	walnut_red	-7.9	-0.1	11.9	16434	10.1356
4	conjunction	1	15	acorn_blue	-8.6	-0.2	9.3	2067	2.69258
4	conjunction	1	16	walnut_red	-12.6	0.1	9.8	6451	4.03113
4	conjunction	1	17	acorn_blue	-13.7	0.1	9.1	3633	1.30384
4	conjunction	1	18	walnut_red	-12.1	-0.1	5.9	4700	3.57771
4	conjunction	1	19	acorn_blue	-14.4	0.1	6.6	9033	2.40416
4	conjunction	1	20	acorn_blue	-18	0.4	-1.3	12551	8.68159
4	conjunction	1	21	acorn_blue	-15.4	0.2	-5.1	7768	4.60435
4	conjunction	1	22	walnut_red	-16	0.3	-6.3	3868	1.34164
4	conjunction	1	23	walnut_red	-9.7	0.3	-15.6	26001	11.233
4	conjunction	1	24	acorn_blue	-6.6	0.3	-16.5	2750	3.228
4	conjunction	1	25	acorn_blue	0.8	0.2	-17	8472	7.41687
4	conjunction	1	26	walnut_red	4	0.1	-15.6	8411	3.49285
4	conjunction	1	27	acorn_blue	3.6	0.2	-16.7	7451	1.17047
4	conjunction	1	28	walnut_red	3.7	0	-14.1	3533	2.60192
4	conjunction	1	29	walnut_red	0.8	-0.3	-7.4	8651	7.30068
4	conjunction	1	30	acorn_blue	2.2	-0.2	-6.2	2167	1.84391
4	conjunction	2	1	walnut_red	-1.5	0	-12	0	0
4	conjunction	2	2	walnut_red	-0.4	0	-10.8	1933	1.62788
4	conjunction	2	3	walnut_red	2.6	-0.2	-10.5	3551	3.01496
4	conjunction	2	4	acorn_blue	4.9	-0.1	-9.8	3317	2.40416
4	conjunction	2	5	walnut_red	6.2	-0.6	-4.6	6433	5.36004
4	conjunction	2	6	acorn_blue	10.5	-0.1	3.4	13635	9.0824
4	conjunction	2	7	walnut_red	12.6	-0.1	4	3268	2.18403
4	conjunction	2	8	walnut_red	11.3	0.1	7.5	5483	3.73363
4	conjunction	2	9	walnut_red	13.4	0.2	8.2	3616	2.21359
4	conjunction	2	10	acorn_blue	15.9	0.4	9.9	2302	3.02324
4	conjunction	2	11	walnut_red	9.6	0.2	9.3	11601	6.32851
4	conjunction	2	12	acorn_blue	8.5	-0.1	7.8	5448	1.86011
4	conjunction	2	13	walnut_red	-12	0.3	13.8	28901	21.36
4	conjunction	2	14	acorn_blue	-7.4	0.2	-15.6	32687	29.7577
4	conjunction	2	15	walnut_red	-6.6	0.3	-16.5	1033	1.20416
4	conjunction	2	16	acorn_blue	1.2	0.3	-18.6	7900	8.07775
4	conjunction	2	17	walnut_red	3.7	0.3	-17.8	4166	2.62488
4	conjunction	2	18	walnut_red	4	0.1	-15.6	5601	2.22036
4	conjunction	2	19	walnut_red	5.8	0	-13.7	3588	2.61725
4	conjunction	2	20	acorn_blue	9.5	0.1	-14.6	5928	3.80789
4	conjunction	2	21	walnut_red	10.6	0	-13.7	2525	1.42127
4	conjunction	2	22	walnut_red	12.9	0	-11.7	2443	3.04795
4	conjunction	2	23	acorn_blue	11.4	-0.1	-11.8	5074	1.50333
4	conjunction	2	24	acorn_blue	13.2	0	-0.3	23644	11.64
4	conjunction	2	25	walnut_red	15	0.2	1.3	3400	2.40832
4	conjunction	2	26	acorn_blue	16.9	0.4	0.8	3788	1.96469
4	conjunction	2	27	walnut_red	3.6	0.3	1.9	27350	13.3454
4	conjunction	2	28	walnut_red	2.3	0.5	2.5	2930	1.43178
4	conjunction	2	29	walnut_red	-9.3	-0.4	-2.7	25852	12.7122
4	conjunction	2	30	walnut_red	-8.1	-0.3	-5.3	6600	2.86356
4	conjunction	3	1	acorn_blue	-4	0.1	0.6	0	0
4	conjunction	3	2	walnut_red	-6.2	-0.3	2.9	6355	3.18277
4	conjunction	3	3	walnut_red	-5.2	-0.5	7.4	4101	4.60977
4	conjunction	3	4	walnut_red	-6.9	-0.3	7.7	3350	1.72627
4	conjunction	3	5	walnut_red	-7.6	-0.4	6	3600	1.83848
4	conjunction	3	6	acorn_blue	-2.5	0.4	-1.9	9898	9.40319
4	conjunction	3	7	walnut_red	-8.1	-0.3	-5.3	9925	6.55134
4	conjunction	3	8	walnut_red	-8.8	-0.3	-3.9	4181	1.56525
4	conjunction	3	9	acorn_blue	-10.6	-0.2	-7	9316	3.58469
4	conjunction	3	10	walnut_red	-9.7	0.3	-15.6	16283	8.64696
4	conjunction	3	11	walnut_red	-4.8	-0.1	-11.1	14134	6.65282
4	conjunction	3	12	acorn_blue	-6.1	-0.3	-10.1	3434	1.64012
4	conjunction	3	13	walnut_red	3.9	-0.1	-11.9	13851	10.1607
4	conjunction	3	14	acorn_blue	3.7	0	-14.1	2750	2.20907
4	conjunction	3	15	walnut_red	3.6	0.2	-16.7	3769	2.60192
4	conjunction	3	16	acorn_blue	2.4	0.3	-17.8	3265	1.62788
4	conjunction	3	17	walnut_red	1.2	0	-4.5	16000	13.354
4	conjunction	3	18	acorn_blue	1.8	0.3	-2.7	2817	1.89737
4	conjunction	3	19	walnut_red	2.5	0.5	-0.8	3086	2.02485
4	conjunction	3	20	walnut_red	11.3	0.1	7.5	23199	12.0967
4	conjunction	3	21	acorn_blue	7.4	-0.2	8.2	5567	3.96232
4	conjunction	3	22	walnut_red	6.4	-0.1	10.9	4550	2.87924
4	conjunction	3	23	walnut_red	4.7	-0.1	11.5	2484	1.80278
4	conjunction	3	24	acorn_blue	2.7	0	11.7	1700	2.00998
4	conjunction	3	25	acorn_blue	-4.5	0	15.6	11817	8.18841
4	conjunction	3	26	walnut_red	-7	0.2	16.1	2100	2.54951
4	conjunction	3	27	acorn_blue	-12	0.3	13.8	8601	5.50364
4	conjunction	3	28	walnut_red	-13.2	0.2	11.8	3966	2.33238
4	conjunction	3	29	walnut_red	-12.5	0	7.5	5736	4.3566
4	conjunction	3	30	walnut_red	-15.2	0.1	3	7065	5.24786
4	conjunction	4	1	walnut_red	-2.9	0.3	1.7	0	0
4	conjunction	4	2	acorn_blue	-5.3	-0.1	1.8	4116	2.40208
4	conjunction	4	3	acorn_blue	-6.2	-0.3	2.9	2908	1.42127
4	conjunction	4	4	walnut_red	-7.6	-0.4	6	4142	3.40147
4	conjunction	4	5	acorn_blue	-12.1	-0.1	5.9	3734	4.50111
4	conjunction	4	6	acorn_blue	-14.4	0.1	6.6	1935	2.40416
4	conjunction	4	7	walnut_red	-12.6	0.1	9.8	7032	3.67151
4	conjunction	4	8	acorn_blue	-12	0.3	13.8	4284	4.04475
4	conjunction	4	9	acorn_blue	-10.6	0.1	13.6	2649	1.41421
4	conjunction	4	10	acorn_blue	-6.1	0.3	16.6	5568	5.40833
4	conjunction	4	11	walnut_red	-0.9	0.1	14.1	7233	5.76975
4	conjunction	4	12	acorn_blue	0.5	0.1	12.9	3285	1.84391
4	conjunction	4	13	walnut_red	2.7	0	11.7	3199	2.50599
4	conjunction	4	14	walnut_red	4.7	-0.3	10.2	1967	2.5
4	conjunction	4	15	acorn_blue	4.7	-0.1	11.5	5374	1.3
4	conjunction	4	16	walnut_red	3.8	0.5	16.5	4227	5.08035
4	conjunction	4	17	acorn_blue	0.8	0.5	17.1	4299	3.05941
4	conjunction	4	18	walnut_red	-1.6	-0.5	7.7	12981	9.70155
4	conjunction	4	19	acorn_blue	-3	-0.5	6.9	3675	1.61245
4	conjunction	4	20	acorn_blue	-2	-0.3	5.4	3781	1.80278
4	conjunction	4	21	acorn_blue	0.1	0.1	4.1	3381	2.46982
4	conjunction	4	22	walnut_red	5	-0.4	5.1	13270	5.001
4	conjunction	4	23	acorn_blue	6.3	-0.4	5.4	2748	1.33417
4	conjunction	4	24	walnut_red	1.8	-0.4	7.5	11384	4.96588
4	conjunction	4	25	acorn_blue	-0.3	-0.2	5.6	2317	2.83196
4	conjunction	4	26	walnut_red	-9.3	-0.1	10.9	12401	10.4446
4	conjunction	4	27	walnut_red	-15.8	0.2	10.5	7101	6.5123
4	conjunction	4	28	acorn_blue	-10.6	-0.2	-7	24078	18.2562
4	conjunction	4	29	acorn_blue	-8.9	-0.1	-7.2	2556	1.71172
4	conjunction	4	30	acorn_blue	-6.1	-0.3	-10.1	7601	4.03113
4	conjunction	5	1	walnut_red	-2.9	0.3	1.7	0	0
4	conjunction	5	2	acorn_blue	-5.5	-0.2	-0.8	5117	3.60694
4	conjunction	5	3	walnut_red	-5	-0.1	-1.8	1167	1.11803
4	conjunction	5	4	acorn_blue	-8.1	-0.3	-5.3	6336	4.67547
4	conjunction	5	5	walnut_red	-7.7	-0.2	-6.5	2764	1.26491
4	conjunction	5	6	walnut_red	-0.4	0	-10.8	10037	8.47231
4	conjunction	5	7	acorn_blue	-3	-0.1	-11.2	5698	2.63059
4	conjunction	5	8	acorn_blue	-3.9	0	-13.2	3783	2.19317
4	conjunction	5	9	walnut_red	-7.4	0.2	-15.6	3617	4.24382
4	conjunction	5	10	acorn_blue	-6.6	0.3	-16.5	5601	1.20416
4	conjunction	5	11	walnut_red	-11.8	0.2	-13.1	6117	6.21289
4	conjunction	5	12	acorn_blue	-11.4	0	-11.7	2790	1.45602
4	conjunction	5	13	walnut_red	-10.6	-0.2	-7	3892	4.7676
4	conjunction	5	14	acorn_blue	-17.5	0.3	-3.3	10101	7.82943
4	conjunction	5	15	acorn_blue	-17	0.3	2.4	6601	5.72189
4	conjunction	5	16	walnut_red	-18.3	0.4	4.1	2917	2.14009
4	conjunction	5	17	walnut_red	-11	0	8.9	9418	8.7367
4	conjunction	5	18	walnut_red	-13.7	0.1	9.1	4516	2.7074
4	conjunction	5	19	acorn_blue	-13.2	0.2	11.8	4067	2.74591
4	conjunction	5	20	acorn_blue	-10.6	0.1	13.6	4318	3.16228
4	conjunction	5	21	walnut_red	-6.2	0	13.5	3949	4.40114
4	conjunction	5	22	walnut_red	-4.5	0	15.6	4000	2.70185
4	conjunction	5	23	acorn_blue	-6.1	0.3	16.6	3268	1.8868
4	conjunction	5	24	acorn_blue	3.8	0.5	16.5	10649	9.90051
4	conjunction	5	25	walnut_red	7.8	0.3	13.3	5656	5.1225
4	conjunction	5	26	acorn_blue	14.5	0.4	11.6	7401	6.91231
4	conjunction	5	27	walnut_red	12.6	-0.1	4	11194	7.8339
4	conjunction	5	28	walnut_red	10.5	-0.1	3.4	3184	2.18403
4	conjunction	5	29	walnut_red	15.9	0.3	-0.9	9288	6.9029
4	conjunction	5	30	walnut_red	17.2	0.6	-0.5	1332	1.36015
5	feature	1	1	acorn_red	-2.1	0.3	2.8	0	0
5	feature	1	2	acorn_blue	-1	0.1	4	4535	1.62788
5	feature	1	3	acorn_red	0.1	-0.4	7.1	7165	3.28938
5	feature	1	4	acorn_blue	-1.6	-0.5	7.7	3851	1.80278
5	feature	1	5	acorn_blue	-3	-0.5	6.9	3101	1.61245
5	feature	1	6	acorn_red	-5.2	-0.5	7.4	3870	2.2561
5	feature	1	7	acorn_blue	-7.6	-0.4	6	3613	2.77849
5	feature	1	8	acorn_blue	-11.7	-0.3	3.6	3716	4.75079
5	feature	1	9	acorn_red	-6.7	-0.4	4.1	8651	5.02494
5	feature	1	10	acorn_red	-6.2	-0.3	2.9	2668	1.3
5	feature	1	11	acorn_blue	-5.5	-0.2	-0.8	5533	3.76563
5	feature	1	12	acorn_blue	-6.1	-0.3	-10.1	8050	9.31933
5	feature	1	13	acorn_blue	-4.8	-0.1	-11.1	2666	1.64012
5	feature	1	14	acorn_red	-5.8	-0.1	-12.7	4367	1.8868
5	feature	1	15	acorn_red	-6.9	0.1	-13.9	1284	1.62788
5	feature	1	16	acorn_blue	-7.4	0.2	-15.6	2653	1.772
5	feature	1	17	acorn_red	-6.6	0.3	-16.5	3630	1.20416
5	feature	1	18	acorn_blue	2.4	0.3	-17.8	9418	9.0934
5	feature	1	19	acorn_blue	3.7	0.3	-17.8	1200	1.3
5	feature	1	20	acorn_red	5.3	0.2	-17	3250	1.78885
5	feature	1	21	acorn_blue	6.5	0.2	-16.2	2150	1.44222
5	feature	1	22	acorn_blue	5.8	0	-13.7	3884	2.59615
5	feature	1	23	acorn_red	5	0	-11.8	2666	2.06155
5	feature	1	24	acorn_red	4.9	-0.1	-9.8	4033	2.0025
5	feature	1	25	acorn_blue	6.3	-0.2	-9.8	4467	1.4
5	feature	1	26	acorn_red	8.9	-0.2	-10.8	2622	2.78568
5	feature	1	27	acorn_red	10.6	-0.2	-10.5	2262	1.72627
5	feature	1	28	acorn_blue	12.9	0	-11.7	3585	2.59422
5	feature	1	29	acorn_red	13.2	0.1	-12.6	2050	0.948683
5	feature	1	30	acorn_blue	10.6	0	-13.7	4816	2.82312
5	feature	2	1	acorn_blue	-2.9	0.3	1.7	0	0
5	feature	2	2	acorn_red	-4.4	0	2.4	2749	1.65529
5	feature	2	3	acorn_red	-6.2	-0.3	2.9	2518	1.86815
5	feature	2	4	acorn_red	-6.7	-0.4	4.1	2500	1.3
5	feature	2	5	acorn_blue	-7.6	-0.4	6	2536	2.10238
5	feature	2	6	acorn_blue	-6.9	-0.3	7.7	3848	1.83848
5	feature	2	7	acorn_blue	-3.9	-0.4	5.5	5566	3.72022
5	feature	2	8	acorn_red	-2	-0.3	5.4	2851	1.90263
5	feature	2	9	acorn_red	0.1	0.1	4.1	3649	2.46982
5	feature	2	10	acorn_blue	0.6	0.5	3	2351	1.2083
5	feature	2	11	acorn_blue	2.3	0.5	2.5	3033	1.772
5	feature	2	12	acorn_red	5.8	-0.2	3.1	8651	3.55106
5	feature	2	13	acorn_red	6.3	-0.4	5.4	4200	2.35372
5	feature	2	14	acorn_blue	6.4	-0.1	10.9	4434	5.50091
5	feature	2	15	acorn_blue	4.7	0.3	14.7	6901	4.16293
5	feature	2	16	acorn_blue	3.8	0.5	16.5	2600	2.01246
5	feature	2	17	acorn_red	3.6	0.5	18.4	2732	1.9105
5	feature	2	18	acorn_red	2.6	0.4	15.8	6034	2.78568
5	feature	2	19	acorn_blue	2.7	0	11.7	3218	4.10122
5	feature	2	20	acorn_blue	2.8	-0.2	10.3	1150	1.40357
5	feature	2	21	acorn_blue	1.8	-0.4	7.5	3667	2.97321
5	feature	2	22	acorn_red	-1	0.1	4	6819	4.48219
5	feature	2	23	acorn_blue	4.7	-0.3	10.2	17882	8.422
5	feature	2	24	acorn_red	7.8	0.3	13.3	4301	4.38406
5	feature	2	25	acorn_blue	10.4	0.3	12.2	3335	2.82312
5	feature	2	26	acorn_red	13.4	0.2	8.2	5084	5
5	feature	2	27	acorn_red	15.8	0.3	7.2	4397	2.6
5	feature	2	28	acorn_blue	17.4	0.4	5.2	3568	2.56125
5	feature	2	29	acorn_blue	15.4	0.2	2.7	3049	3.20156
5	feature	2	30	acorn_blue	15	0.2	1.3	1183	1.45602
5	feature	3	1	acorn_blue	-2.1	0.3	2.8	0	0
5	feature	3	2	acorn_blue	-0.3	-0.2	5.6	4933	3.32866
5	feature	3	3	acorn_blue	0.1	-0.4	7.1	2367	1.55242
5	feature	3	4	acorn_red	-1.6	-0.5	7.7	2833	1.80278
5	feature	3	5	acorn_red	-5.2	-0.5	7.4	3620	3.61248
5	feature	3	6	acorn_blue	-7.6	-0.4	6	2580	2.77849
5	feature	3	7	acorn_blue	-11.7	-0.3	3.6	3717	4.75079
5	feature	3	8	acorn_red	-15.2	0.1	3	5084	3.55106
5	feature	3	9	acorn_red	-17	0.3	2.4	3819	1.89737
5	feature	3	10	acorn_red	-18.3	0.4	4.1	7865	2.14009
5	feature	3	11	acorn_blue	-6.7	-0.4	4.1	11036	11.6
5	feature	3	12	acorn_red	-6.2	-0.3	2.9	6498	1.3
5	feature	3	13	acorn_blue	-5.5	-0.2	-0.8	6001	3.76563
5	feature	3	14	acorn_red	-5	-0.1	-1.8	2150	1.11803
5	feature	3	15	acorn_blue	-2.6	-0.3	-5.6	3484	4.49444
5	feature	3	16	acorn_blue	-1	-0.4	-6.4	1483	1.78885
5	feature	3	17	acorn_blue	0.8	-0.3	-7.4	1666	2.05913
5	feature	3	18	acorn_blue	3.3	-0.1	-9.2	3401	3.08058
5	feature	3	19	acorn_red	6.3	-0.2	-9.8	3884	3.05941
5	feature	3	20	acorn_blue	8.9	-0.2	-10.8	2199	2.78568
5	feature	3	21	acorn_blue	11.4	-0.1	-11.8	2101	2.69258
5	feature	3	22	acorn_blue	9.1	-0.1	-12.5	9366	2.40416
5	feature	3	23	acorn_red	9.5	-0.3	-9	4117	3.52278
5	feature	3	24	acorn_blue	10.9	-0.3	-7.6	2883	1.9799
5	feature	3	25	acorn_blue	11.4	-0.2	-5.2	3067	2.45153
5	feature	3	26	acorn_blue	12.3	0	-3.3	2618	2.10238
5	feature	3	27	acorn_red	14.7	0.4	-3.6	3967	2.41868
5	feature	3	28	acorn_red	17.6	0.6	-2.3	3449	3.17805
5	feature	3	29	acorn_red	16.9	0.4	0.8	5100	3.17805
5	feature	3	30	acorn_blue	15.4	0.2	2.7	2135	2.42074
5	feature	4	1	acorn_red	-1	0.1	4	0	0
5	feature	4	2	acorn_red	-2	-0.3	5.4	2717	1.72047
5	feature	4	3	acorn_blue	-1.7	-0.4	6.4	2469	1.04403
5	feature	4	4	acorn_red	-3	-0.5	6.9	3331	1.39284
5	feature	4	5	acorn_blue	-5.2	-0.5	7.4	1967	2.2561
5	feature	4	6	acorn_blue	-6.9	-0.3	7.7	1183	1.72627
5	feature	4	7	acorn_blue	-11	0	8.9	3350	4.272
5	feature	4	8	acorn_red	-12.5	0	7.5	3785	2.05183
5	feature	4	9	acorn_blue	-14.4	0.1	6.6	1900	2.10238
5	feature	4	10	acorn_red	-18.3	0.4	4.1	3749	4.63249
5	feature	4	11	acorn_blue	-17	0.3	2.4	3733	2.14009
5	feature	4	12	acorn_blue	-15.2	0.1	3	3484	1.89737
5	feature	4	13	acorn_red	-13.4	0	3.5	1650	1.86815
5	feature	4	14	acorn_blue	-15	0.2	-3.7	10385	7.37564
5	feature	4	15	acorn_blue	-17.5	0.3	-3.3	3700	2.5318
5	feature	4	16	acorn_blue	-18	0.4	-1.3	2815	2.06155
5	feature	4	17	acorn_blue	-6.7	-0.4	4.1	11203	12.524
5	feature	4	18	acorn_blue	-6.2	-0.3	2.9	5967	1.3
5	feature	4	19	acorn_blue	-4.4	0	2.4	5083	1.86815
5	feature	4	20	acorn_blue	-2.9	0.3	1.7	1467	1.65529
5	feature	4	21	acorn_red	-2.8	0.4	-0.8	5916	2.502
5	feature	4	22	acorn_red	-1.6	0.5	-1.5	2967	1.38924
5	feature	4	23	acorn_red	-1.2	0.4	-2.9	4053	1.45602
5	feature	4	24	acorn_blue	-1	-0.4	-6.4	3964	3.50571
5	feature	4	25	acorn_blue	0.7	-0.3	-6.4	3483	1.7
5	feature	4	26	acorn_red	2.2	-0.2	-6.2	1267	1.51327
5	feature	4	27	acorn_blue	6.8	-0.6	-3.3	5985	5.43783
5	feature	4	28	acorn_red	7.6	-0.5	-1.7	2649	1.78885
5	feature	4	29	acorn_red	10	-0.4	0.5	3818	3.25576
5	feature	4	30	acorn_blue	10.5	-0.1	3.4	5016	2.94279
5	feature	5	1	acorn_red	-1.6	0.5	-1.5	0	0
5	feature	5	2	acorn_blue	-0.3	-0.2	-5.1	10152	3.82753
5	feature	5	3	acorn_red	1.2	0	-4.5	3149	1.61555
5	feature	5	4	acorn_blue	2.8	0.1	-3.8	2567	1.74642
5	feature	5	5	acorn_red	4.4	-0.2	-3.2	1384	1.7088
5	feature	5	6	acorn_red	6.8	-0.6	-3.3	2749	2.40208
5	feature	5	7	acorn_blue	8.2	-0.5	-2.8	2250	1.48661
5	feature	5	8	acorn_red	9.4	-0.4	-1.6	2251	1.69706
5	feature	5	9	acorn_red	10	-0.4	0.5	2900	2.18403
5	feature	5	10	acorn_blue	10.3	-0.3	2.3	1419	1.82483
5	feature	5	11	acorn_blue	10.5	-0.1	3.4	931	1.11803
5	feature	5	12	acorn_red	11.4	0	5.9	3284	2.65707
5	feature	5	13	acorn_blue	11.3	0.1	7.5	3549	1.60312
5	feature	5	14	acorn_red	13.4	0.2	8.2	3701	2.21359
5	feature	5	15	acorn_blue	15.9	0.4	9.9	5652	3.02324
5	feature	5	16	acorn_red	14.5	0.4	11.6	6631	2.20227
5	feature	5	17	acorn_red	10.4	0.3	12.2	6467	4.14367
5	feature	5	18	acorn_red	8.8	0.1	11.4	2600	1.78885
5	feature	5	19	acorn_red	8.1	0	10.2	3686	1.38924
5	feature	5	20	acorn_blue	4.7	-0.3	10.2	2916	3.4
5	feature	5	21	acorn_blue	2.8	-0.2	10.3	1585	1.90263
5	feature	5	22	acorn_red	2.7	0	11.7	3481	1.40357
5	feature	5	23	acorn_red	3.8	0.5	16.5	6118	4.92443
5	feature	5	24	acorn_red	3.6	0.5	18.4	1549	1.9105
5	feature	5	25	acorn_blue	6	0.5	16.3	8000	3.18904
5	feature	5	26	acorn_blue	14.1	0	3	12553	15.5724
5	feature	5	27	acorn_blue	15.4	0.2	2.7	2231	1.33417
5	feature	5	28	acorn_red	15	0.2	1.3	3251	1.45602
5	feature	5	29	acorn_red	12.4	0	-2.2	5450	4.36005
5	feature	5	30	acorn_blue	11.4	-0.2	-5.2	3734	3.16228
5	conjunction	1	1	acorn_blue	2.8	-0.2	10.3	0	0
5	conjunction	1	2	walnut_red	-4.9	-0.1	11.5	11267	7.79295
5	conjunction	1	3	walnut_red	-4.5	0	15.6	6485	4.11947
5	conjunction	1	4	acorn_blue	-7	0.2	16.1	5417	2.54951
5	conjunction	1	5	walnut_red	-12.6	0.1	9.8	15116	8.42912
5	conjunction	1	6	walnut_red	-13.7	0.1	9.1	1036	1.30384
5	conjunction	1	7	walnut_red	-5.5	-0.2	-0.8	22549	12.855
5	conjunction	1	8	walnut_red	-2.8	0.4	-0.8	4717	2.7
5	conjunction	1	9	acorn_blue	0.7	-0.3	-6.4	17652	6.60379
5	conjunction	1	10	acorn_blue	2.2	-0.2	-6.2	6767	1.51327
5	conjunction	1	11	walnut_red	7.6	-0.5	-1.7	17266	7.02922
5	conjunction	1	12	acorn_blue	9.4	-0.4	-1.6	3419	1.80278
5	conjunction	1	13	walnut_red	5.8	-0.2	3.1	7816	5.9203
5	conjunction	1	14	walnut_red	6.3	-0.4	5.4	4219	2.35372
5	conjunction	1	15	walnut_red	4.7	-0.3	10.2	12065	5.05964
5	conjunction	1	16	acorn_blue	-16.8	0.3	-7.8	72555	28.0401
5	conjunction	1	17	acorn_blue	-15.4	0.2	-9.6	6583	2.28035
5	conjunction	1	18	acorn_blue	-13.9	0.2	-11.3	7451	2.26716
5	conjunction	1	19	walnut_red	-9.7	0.3	-15.6	9583	6.01082
5	conjunction	1	20	walnut_red	-9.1	0.2	-14	3917	1.7088
5	conjunction	1	21	walnut_red	-7.4	0.2	-15.6	5950	2.33452
5	conjunction	1	22	walnut_red	-5.8	-0.1	-12.7	8368	3.3121
5	conjunction	1	23	acorn_blue	-0.4	0	-10.8	14668	5.72451
5	conjunction	1	24	walnut_red	5	0	-11.8	5533	5.49181
5	conjunction	1	25	acorn_blue	10.6	-0.2	-10.5	19919	5.74891
5	conjunction	1	26	walnut_red	11.4	-0.1	-11.8	3886	1.52643
5	conjunction	1	27	walnut_red	13.2	0.1	-12.6	2904	1.96977
5	conjunction	1	28	acorn_blue	14.8	0.2	-9	7592	3.93954
5	conjunction	1	29	acorn_blue	12.4	0	-2.2	26120	7.2111
5	conjunction	1	30	walnut_red	12.1	-0.1	0.7	5316	2.91548
5	conjunction	2	1	acorn_blue	-4.4	0	2.4	0	0
5	conjunction	2	2	acorn_blue	-6.2	-0.3	2.9	3263	1.86815
5	conjunction	2	3	walnut_red	-6.7	-0.4	4.1	2720	1.3
5	conjunction	2	4	walnut_red	-7.6	-0.4	6	1713	2.10238
5	conjunction	2	5	acorn_blue	-7.9	-0.1	11.9	12518	5.90762
5	conjunction	2	6	acorn_blue	-10.6	0.1	13.6	3771	3.19061
5	conjunction	2	7	walnut_red	-12.6	0.1	9.8	9112	4.29418
5	conjunction	2	8	walnut_red	-8.6	-0.2	9.3	12101	4.03113
5	conjunction	2	9	walnut_red	-6.2	0	13.5	11590	4.83735
5	conjunction	2	10	acorn_blue	-4.5	0	15.6	3378	2.70185
5	conjunction	2	11	acorn_blue	-0.9	0.1	14.1	4950	3.9
5	conjunction	2	12	walnut_red	3.6	0.5	18.4	14417	6.22415
5	conjunction	2	13	acorn_blue	7.8	0.3	13.3	13079	6.60681
5	conjunction	2	14	acorn_blue	14.5	0.4	11.6	6740	6.91231
5	conjunction	2	15	acorn_blue	14.3	0.2	5.5	12132	6.10328
5	conjunction	2	16	walnut_red	14.1	0	3	2868	2.50799
5	conjunction	2	17	walnut_red	17.4	0.4	5.2	22734	3.96611
5	conjunction	2	18	walnut_red	17.2	0.6	-0.5	7785	5.70351
5	conjunction	2	19	walnut_red	17.6	0.6	-2.3	2250	1.84391
5	conjunction	2	20	acorn_blue	14.8	0.2	-9	9317	7.26154
5	conjunction	2	21	acorn_blue	13.5	0.1	-7.7	10250	1.83848
5	conjunction	2	22	walnut_red	9.1	-0.1	-12.5	16286	6.51153
5	conjunction	2	23	walnut_red	10.6	0	-13.7	3582	1.92094
5	conjunction	2	24	walnut_red	13.2	0.1	-12.6	4101	2.82312
5	conjunction	2	25	walnut_red	6.5	0.2	-16.2	15702	7.60592
5	conjunction	2	26	walnut_red	3.7	0.3	-17.8	4732	3.2249
5	conjunction	2	27	acorn_blue	0.8	0.2	-17	2550	3.00832
5	conjunction	2	28	acorn_blue	1.2	0.3	-18.6	4883	1.64924
5	conjunction	2	29	acorn_blue	-9.1	0.2	-14	16953	11.2805
5	conjunction	2	30	walnut_red	-11.8	0.2	-13.1	3683	2.84605
5	conjunction	3	1	acorn_blue	-2	-0.3	5.4	0	0
5	conjunction	3	2	walnut_red	-0.3	-0.2	5.6	3269	1.71172
5	conjunction	3	3	acorn_blue	0.1	0.1	4.1	6482	1.55242
5	conjunction	3	4	walnut_red	-3	-0.5	6.9	16800	4.17732
5	conjunction	3	5	walnut_red	-5.2	-0.5	7.4	4656	2.2561
5	conjunction	3	6	acorn_blue	-7.6	-0.4	6	2512	2.77849
5	conjunction	3	7	acorn_blue	-4.4	0	2.4	9516	4.81664
5	conjunction	3	8	walnut_red	-2.9	0.3	1.7	1518	1.65529
5	conjunction	3	9	walnut_red	0.7	-0.3	-6.4	21756	8.86397
5	conjunction	3	10	walnut_red	0.8	-0.3	-7.4	1095	1.00499
5	conjunction	3	11	acorn_blue	2.2	-0.2	-6.2	6068	1.84391
5	conjunction	3	12	acorn_blue	2.8	0.1	-3.8	3732	2.47386
5	conjunction	3	13	acorn_blue	-5.5	-0.2	-0.8	27886	8.82553
5	conjunction	3	14	walnut_red	-5	-0.1	-1.8	2134	1.11803
5	conjunction	3	15	walnut_red	-7.7	-0.2	-6.5	8370	5.42033
5	conjunction	3	16	acorn_blue	-7.2	-0.3	-8.2	3780	1.772
5	conjunction	3	17	walnut_red	-8.8	-0.3	-3.9	12550	4.58803
5	conjunction	3	18	acorn_blue	-12	0.2	11.8	19619	16.0228
5	conjunction	3	19	walnut_red	-13.2	0.2	11.8	6683	1.2
5	conjunction	3	20	walnut_red	-15.8	0.2	10.5	4988	2.90689
5	conjunction	3	21	walnut_red	-16.4	0.3	7.5	4246	3.05941
5	conjunction	3	22	acorn_blue	-16	0.2	5.4	3169	2.13776
5	conjunction	3	23	acorn_blue	-13.4	0	3.5	14148	3.22025
5	conjunction	3	24	acorn_blue	-15	0.2	-3.7	6835	7.37564
5	conjunction	3	25	walnut_red	-12.7	0	-6	4733	3.25269
5	conjunction	3	26	walnut_red	-11.4	0	-11.7	4717	5.84637
5	conjunction	3	27	walnut_red	-5.8	-0.1	-12.7	9517	5.68859
5	conjunction	3	28	acorn_blue	-4.8	-0.1	-11.1	1700	1.8868
5	conjunction	3	29	acorn_blue	-1.8	-0.2	-9.3	6467	3.49857
5	conjunction	3	30	acorn_blue	5	0	-11.8	10184	7.245
5	conjunction	4	1	walnut_red	-2.8	0.4	-0.8	0	0
5	conjunction	4	2	walnut_red	-5.3	-0.1	1.8	6484	3.60694
5	conjunction	4	3	acorn_blue	-6.2	-0.3	2.9	2299	1.42127
5	conjunction	4	4	walnut_red	-7.6	-0.4	6	11885	3.40147
5	conjunction	4	5	walnut_red	-8.7	-0.2	7	2349	1.48661
5	conjunction	4	6	walnut_red	-6.9	-0.3	7.7	6651	1.93132
5	conjunction	4	7	acorn_blue	-5.2	-0.5	7.4	6666	1.72627
5	conjunction	4	8	acorn_blue	-12	0.2	11.8	13202	8.09938
5	conjunction	4	9	acorn_blue	-13.2	0.2	11.8	1866	1.2
5	conjunction	4	10	acorn_blue	-13.7	0.1	9.1	4317	2.74591
5	conjunction	4	11	walnut_red	-16	0.2	5.4	6306	4.3566
5	conjunction	4	12	walnut_red	-15.2	0.1	3	4677	2.52982
5	conjunction	4	13	acorn_blue	-18	0.4	-1.3	9504	5.13128
5	conjunction	4	14	acorn_blue	-17.5	0.3	-3.3	5119	2.06155
5	conjunction	4	15	acorn_blue	-15	0.2	-3.7	3379	2.5318
5	conjunction	4	16	acorn_blue	-10.6	-0.2	-7	13568	5.5
5	conjunction	4	17	walnut_red	-7.1	-0.2	-9.4	3335	4.24382
5	conjunction	4	18	acorn_blue	-3.9	-0.1	-9.5	6099	3.20156
5	conjunction	4	19	walnut_red	-1.8	-0.2	-9.3	1783	2.1095
5	conjunction	4	20	walnut_red	0.8	-0.3	-7.4	3566	3.22025
5	conjunction	4	21	walnut_red	0.7	-0.3	-6.4	1032	1.00499
5	conjunction	4	22	acorn_blue	1.2	0	-4.5	3785	1.96469
5	conjunction	4	23	acorn_blue	2.8	0.1	-3.8	3484	1.74642
5	conjunction	4	24	walnut_red	-0.4	0	-10.8	12750	7.69675
5	conjunction	4	25	acorn_blue	-1.5	0	-12	4201	1.62788
5	conjunction	4	26	walnut_red	-9.4	0	-12.5	7417	7.91581
5	conjunction	4	27	walnut_red	1.5	0.3	-15.7	15004	11.36
5	conjunction	4	28	walnut_red	3.7	0.3	-17.8	14307	3.04138
5	conjunction	4	29	acorn_blue	0.8	0.2	-17	2790	3.00832
5	conjunction	4	30	acorn_blue	6.5	0.2	-16.2	12869	5.75587
5	conjunction	5	1	walnut_red	-4	0.1	0.6	0	0
5	conjunction	5	2	acorn_blue	-6.2	-0.3	2.9	5517	3.18277
5	conjunction	5	3	walnut_red	-5.9	-0.5	5.4	2084	2.51794
5	conjunction	5	4	acorn_blue	-7.6	-0.4	6	3200	1.80278
5	conjunction	5	5	walnut_red	-6.9	-0.3	7.7	3067	1.83848
5	conjunction	5	6	acorn_blue	-2	-0.3	10.7	5866	5.74543
5	conjunction	5	7	acorn_blue	0.5	0.1	12.9	2633	3.33017
5	conjunction	5	8	walnut_red	1.5	0.3	14.6	2702	1.97231
5	conjunction	5	9	acorn_blue	6	0.1	12.7	12533	4.88467
5	conjunction	5	10	acorn_blue	6.4	-0.1	10.9	2751	1.84391
5	conjunction	5	11	walnut_red	7.4	-0.2	8.2	2966	2.87924
5	conjunction	5	12	acorn_blue	9.6	0.2	9.3	4135	2.45967
5	conjunction	5	13	walnut_red	13.4	0.2	8.2	5550	3.95601
5	conjunction	5	14	walnut_red	15.9	0.4	9.9	6266	3.02324
5	conjunction	5	15	acorn_blue	11.4	0	5.9	5784	6.0208
5	conjunction	5	16	walnut_red	10.8	-0.3	1.4	5016	4.53982
5	conjunction	5	17	walnut_red	12.1	-0.1	0.7	3001	1.47648
5	conjunction	5	18	acorn_blue	6.3	-0.3	0	19968	5.84209
5	conjunction	5	19	walnut_red	5.6	-0.2	-1.4	2366	1.56525
5	conjunction	5	20	acorn_blue	0.8	-0.3	-7.4	12984	7.68375
5	conjunction	5	21	walnut_red	-1	-0.4	-6.4	9985	2.05913
5	conjunction	5	22	walnut_red	-2.6	-0.3	-5.6	2850	1.78885
5	conjunction	5	23	acorn_blue	-5	-0.1	-1.8	5033	4.49444
5	conjunction	5	24	walnut_red	-2.9	0.3	1.7	5017	4.08167
5	conjunction	5	25	walnut_red	-2	-0.3	5.4	7851	3.80789
5	conjunction	5	26	acorn_blue	-0.3	-0.2	5.6	3416	1.71172
5	conjunction	5	27	walnut_red	1.8	-0.4	7.5	3484	2.83196
5	conjunction	5	28	walnut_red	4.7	-0.1	11.5	4267	4.94065
5	conjunction	5	29	walnut_red	-0.4	0	-10.8	35069	22.8758
5	conjunction	5	30	walnut_red	-1.5	0	-12	1316	1.62788
6	feature	1	1	acorn_blue	-1.6	0.5	-1.5	0	0
6	feature	1	2	acorn_red	-0.3	-0.2	-5.1	6234	3.82753
6	feature	1	3	acorn_red	0.7	-0.3	-6.4	2450	1.64012
6	feature	1	4	acorn_red	1.2	0	-4.5	4983	1.96469
6	feature	1	5	acorn_blue	-1.2	0.4	-2.9	3850	2.88444
6	feature	1	6	acorn_red	-2.8	0.4	-0.8	4418	2.64008
6	feature	1	7	acorn_red	-4	0.1	0.6	3052	1.84391
6	feature	1	8	acorn_red	-5.5	-0.2	-0.8	3714	2.05183
6	feature	1	9	acorn_blue	-4.4	0	2.4	7284	3.38378
6	feature	1	10	acorn_blue	-6.2	-0.3	2.9	3367	1.86815
6	feature	1	11	acorn_red	-6.7	-0.4	4.1	2836	1.3
6	feature	1	12	acorn_blue	-5.9	-0.5	5.4	3665	1.52643
6	feature	1	13	acorn_blue	-7.6	-0.4	6	2583	1.80278
6	feature	1	14	acorn_red	-8.7	-0.2	7	3118	1.48661
6	feature	1	15	acorn_blue	-11	0	8.9	3618	2.98329
6	feature	1	16	acorn_red	-12.6	0.1	9.8	2780	1.83576
6	feature	1	17	acorn_red	-15.8	0.2	10.5	5036	3.27567
6	feature	1	18	acorn_blue	-10.6	0.1	13.6	12366	6.05392
6	feature	1	19	acorn_red	-8.6	-0.2	9.3	7086	4.74236
6	feature	1	20	acorn_blue	-6.9	-0.3	7.7	3298	2.33452
6	feature	1	21	acorn_red	-1.6	-0.5	7.7	6504	5.3
6	feature	1	22	acorn_red	1.8	-0.4	7.5	3280	3.40588
6	feature	1	23	acorn_blue	4	-0.5	7	1884	2.2561
6	feature	1	24	acorn_blue	7.6	-0.5	-1.7	9500	9.41541
6	feature	1	25	acorn_red	6.2	-0.6	-4.6	3784	3.22025
6	feature	1	26	acorn_red	6.3	-0.2	-9.8	5617	5.20096
6	feature	1	27	acorn_red	8.9	-0.2	-10.8	3852	2.78568
6	feature	1	28	acorn_blue	11.4	-0.1	-11.8	2248	2.69258
6	feature	1	29	acorn_red	13.2	0.1	-12.6	1684	1.96977
6	feature	1	30	acorn_blue	10.6	0	-13.7	5216	2.82312
6	feature	2	1	acorn_blue	-2.1	0.3	2.8	0	0
6	feature	2	2	acorn_blue	0.1	-0.4	7.1	5401	4.83011
6	feature	2	3	acorn_blue	2.8	-0.2	10.3	4458	4.18688
6	feature	2	4	acorn_blue	2.7	0	11.7	1576	1.40357
6	feature	2	5	acorn_blue	0.5	0.1	12.9	2935	2.50599
6	feature	2	6	acorn_blue	-0.9	0.1	14.1	1748	1.84391
6	feature	2	7	acorn_red	-1.8	0.3	16.7	2284	2.75136
6	feature	2	8	acorn_red	0.8	0.5	17.1	3482	2.63059
6	feature	2	9	acorn_red	3.8	0.5	16.5	4179	3.05941
6	feature	2	10	acorn_red	6	0.5	16.3	3339	2.20907
6	feature	2	11	acorn_red	7.8	0.3	13.3	5057	3.49857
6	feature	2	12	acorn_blue	6	0.1	12.7	2654	1.89737
6	feature	2	13	acorn_blue	4.7	-0.3	10.2	3590	2.8178
6	feature	2	14	acorn_red	8.1	0	10.2	4501	3.4
6	feature	2	15	acorn_red	8.8	0.1	11.4	2767	1.38924
6	feature	2	16	acorn_blue	7.4	-0.2	8.2	5306	3.49285
6	feature	2	17	acorn_red	6.3	-0.4	5.4	2513	3.00832
6	feature	2	18	acorn_blue	5.8	-0.2	3.1	1916	2.35372
6	feature	2	19	acorn_blue	6.3	-0.3	0	3765	3.14006
6	feature	2	20	acorn_red	5.6	-0.2	-1.4	2684	1.56525
6	feature	2	21	acorn_red	8	-0.5	-4.9	6482	4.24382
6	feature	2	22	acorn_blue	9.5	-0.3	-9	4854	4.36578
6	feature	2	23	acorn_blue	8.9	-0.2	-10.8	2889	1.89737
6	feature	2	24	acorn_red	9.1	-0.1	-12.5	1543	1.71172
6	feature	2	25	acorn_blue	9.5	0.1	-14.6	1683	2.13776
6	feature	2	26	acorn_blue	10.6	0	-13.7	3366	1.42127
6	feature	2	27	acorn_red	12.9	0	-11.7	2521	3.04795
6	feature	2	28	acorn_blue	11.3	-0.2	-9.9	3646	2.40832
6	feature	2	29	acorn_red	10.6	-0.2	-10.5	2800	0.921954
6	feature	2	30	acorn_blue	7.6	0.1	-15.3	4751	5.66039
6	feature	3	1	acorn_red	-1.6	0.5	-1.5	0	0
6	feature	3	2	acorn_red	-2.5	0.4	-1.9	1799	0.984886
6	feature	3	3	acorn_blue	-2.8	0.4	-0.8	1934	1.14018
6	feature	3	4	acorn_red	-4	0.1	0.6	2834	1.84391
6	feature	3	5	acorn_red	-4.4	0	2.4	3852	1.84391
6	feature	3	6	acorn_blue	-6.2	-0.3	2.9	1865	1.86815
6	feature	3	7	acorn_red	-6.7	-0.4	4.1	1200	1.3
6	feature	3	8	acorn_blue	-5.2	-0.5	7.4	5503	3.62491
6	feature	3	9	acorn_blue	-3	-0.5	6.9	2184	2.2561
6	feature	3	10	acorn_red	-1.6	-0.5	7.7	2530	1.61245
6	feature	3	11	acorn_red	1.8	-0.4	7.5	3567	3.40588
6	feature	3	12	acorn_blue	4	-0.5	7	2320	2.2561
6	feature	3	13	acorn_red	6.3	-0.4	5.4	2380	2.80179
6	feature	3	14	acorn_blue	6.3	-0.3	0	4768	5.4
6	feature	3	15	acorn_red	6.8	-0.6	-3.3	2780	3.33766
6	feature	3	16	acorn_blue	8	-0.5	-4.9	1620	2
6	feature	3	17	acorn_red	8.2	-0.5	-2.8	3433	2.1095
6	feature	3	18	acorn_red	9.4	-0.4	-1.6	1445	1.69706
6	feature	3	19	acorn_blue	15.9	0.3	-0.9	5372	6.53758
6	feature	3	20	acorn_red	16.9	0.4	0.8	1800	1.97231
6	feature	3	21	acorn_red	15	0.2	1.3	5734	1.96469
6	feature	3	22	acorn_red	13.4	0	1.6	3754	1.62788
6	feature	3	23	acorn_blue	10.8	-0.3	1.4	3563	2.60768
6	feature	3	24	acorn_blue	5.8	-0.2	3.1	7050	5.2811
6	feature	3	25	acorn_red	3.9	0.1	3	2234	1.90263
6	feature	3	26	acorn_blue	2.5	0.5	-0.8	10769	4.04969
6	feature	3	27	acorn_red	1.2	0.4	-2.7	3900	2.30217
6	feature	3	28	acorn_blue	1.2	0	-4.5	1565	1.8
6	feature	3	29	acorn_red	0.7	-0.3	-6.4	3358	1.96469
6	feature	3	30	acorn_blue	2.2	-0.2	-6.2	1742	1.51327
6	feature	4	1	acorn_red	0.6	0.5	3	0	0
6	feature	4	2	acorn_blue	0.1	0.1	4.1	1184	1.2083
6	feature	4	3	acorn_red	-2	-0.3	5.4	2168	2.46982
6	feature	4	4	acorn_blue	-1.7	-0.4	6.4	2383	1.04403
6	feature	4	5	acorn_red	-2	-0.3	10.7	5718	4.31045
6	feature	4	6	acorn_blue	-0.9	0.1	14.1	4438	3.57351
6	feature	4	7	acorn_red	-1.8	0.3	16.7	3411	2.75136
6	feature	4	8	acorn_red	-6.2	0	13.5	9484	5.44059
6	feature	4	9	acorn_blue	-4.9	-0.1	11.5	2134	2.38537
6	feature	4	10	acorn_blue	-3.3	-0.4	9.2	2383	2.80179
6	feature	4	11	acorn_blue	1.8	-0.4	7.5	5852	5.37587
6	feature	4	12	acorn_red	5	-0.4	7.6	2948	3.20156
6	feature	4	13	acorn_blue	8.1	0	10.2	7867	4.04599
6	feature	4	14	acorn_blue	10.4	0.3	12.2	2484	3.04795
6	feature	4	15	acorn_red	11.3	0.1	7.5	4681	4.78539
6	feature	4	16	acorn_blue	13.4	0.2	8.2	2719	2.21359
6	feature	4	17	acorn_red	15.9	0.4	9.9	2539	3.02324
6	feature	4	18	acorn_blue	17.4	0.4	5.2	7762	4.93356
6	feature	4	19	acorn_red	15.4	0.2	2.7	5769	3.20156
6	feature	4	20	acorn_blue	14.1	0	3	1431	1.33417
6	feature	4	21	acorn_blue	12.6	-0.1	4	1567	1.80278
6	feature	4	22	acorn_blue	10.3	-0.3	2.3	3835	2.86007
6	feature	4	23	acorn_red	10.8	-0.3	1.4	2203	1.02956
6	feature	4	24	acorn_red	10.5	-0.1	3.4	2865	2.02237
6	feature	4	25	acorn_red	10	-0.4	0.5	5519	2.94279
6	feature	4	26	acorn_red	9.4	-0.4	-1.6	2346	2.18403
6	feature	4	27	acorn_red	8.2	-0.5	-2.8	2366	1.69706
6	feature	4	28	acorn_blue	6.8	-0.6	-3.3	1217	1.48661
6	feature	4	29	acorn_red	5.6	-0.2	-1.4	4267	2.24722
6	feature	4	30	acorn_blue	6.3	-0.3	0	1417	1.56525
6	feature	5	1	acorn_red	-2.9	0.3	1.7	0	0
6	feature	5	2	acorn_blue	-4.4	0	2.4	1599	1.65529
6	feature	5	3	acorn_red	-5.3	-0.1	1.8	2918	1.08167
6	feature	5	4	acorn_red	-6.7	-0.4	4.1	3350	2.69258
6	feature	5	5	acorn_red	-11.7	-0.3	3.6	7034	5.02494
6	feature	5	6	acorn_red	-15.2	0.1	3	4786	3.55106
6	feature	5	7	acorn_red	-17	0.3	2.4	2863	1.89737
6	feature	5	8	acorn_blue	-18.3	0.4	4.1	2138	2.14009
6	feature	5	9	acorn_blue	-16	0.2	5.4	3913	2.64197
6	feature	5	10	acorn_blue	-12.1	-0.1	5.9	3253	3.93192
6	feature	5	11	acorn_blue	-11	0	8.9	2551	3.19531
6	feature	5	12	acorn_red	-9.3	-0.1	10.9	2097	2.62488
6	feature	5	13	acorn_red	-6.2	0	13.5	4200	4.04599
6	feature	5	14	acorn_red	-0.7	0.5	18.6	7605	7.50067
6	feature	5	15	acorn_blue	2.6	0.4	15.8	5281	4.32782
6	feature	5	16	acorn_red	3.8	0.5	16.5	2165	1.38924
6	feature	5	17	acorn_red	6	0.5	16.3	1984	2.20907
6	feature	5	18	acorn_red	2.7	0	11.7	8467	5.66127
6	feature	5	19	acorn_blue	4.7	-0.3	10.2	3584	2.5
6	feature	5	20	acorn_red	6.4	-0.1	10.9	2897	1.83848
6	feature	5	21	acorn_red	7.4	-0.2	8.2	4469	2.87924
6	feature	5	22	acorn_red	8.5	-0.1	7.8	1934	1.17047
6	feature	5	23	acorn_blue	11.3	0.1	7.5	2367	2.81603
6	feature	5	24	acorn_blue	13.4	0.2	8.2	1800	2.21359
6	feature	5	25	acorn_blue	15.8	0.3	7.2	2203	2.6
6	feature	5	26	acorn_blue	17.2	0.6	-0.5	7831	7.82624
6	feature	5	27	acorn_red	15.9	0.3	-0.9	2267	1.36015
6	feature	5	28	acorn_red	12.4	0	-2.2	3404	3.73363
6	feature	5	29	acorn_blue	12.3	0	-3.3	1082	1.10454
6	feature	5	30	acorn_blue	11.4	-0.2	-5.2	1948	2.10238
6	conjunction	1	1	walnut_red	0.1	-0.4	7.1	0	0
6	conjunction	1	2	acorn_blue	-6.2	-0.1	10	9819	6.93542
6	conjunction	1	3	walnut_red	-9.3	-0.1	10.9	4735	3.228
6	conjunction	1	4	walnut_red	-12	0.3	13.8	3365	3.96232
6	conjunction	1	5	acorn_blue	-12.6	0.1	9.8	7317	4.04475
6	conjunction	1	6	walnut_red	-14.4	0.1	6.6	5419	3.67151
6	conjunction	1	7	acorn_blue	-16	0.2	5.4	3198	2
6	conjunction	1	8	acorn_blue	-18.3	0.4	4.1	2089	2.64197
6	conjunction	1	9	walnut_red	-15	0.2	-3.7	7362	8.46936
6	conjunction	1	10	acorn_blue	-12.7	0	-6	2717	3.25269
6	conjunction	1	11	acorn_blue	-11.3	-0.1	-4.3	9667	2.20227
6	conjunction	1	12	walnut_red	-9.8	-0.2	-4.7	3951	1.55242
6	conjunction	1	13	walnut_red	-8.8	-0.3	-3.9	2832	1.28062
6	conjunction	1	14	acorn_blue	-8.9	-0.1	-7.2	4668	3.30151
6	conjunction	1	15	walnut_red	-7.4	0.2	-15.6	15067	8.53288
6	conjunction	1	16	walnut_red	-1.5	0	-12	7832	6.91158
6	conjunction	1	17	walnut_red	-0.4	0	-10.8	1468	1.62788
6	conjunction	1	18	walnut_red	0.7	-0.3	-6.4	5884	4.53542
6	conjunction	1	19	acorn_blue	2.8	0.1	-3.8	4203	3.34215
6	conjunction	1	20	acorn_blue	4.4	-0.2	-3.2	2714	1.7088
6	conjunction	1	21	walnut_red	7.6	-0.5	-1.7	5053	3.53412
6	conjunction	1	22	acorn_blue	10.3	-0.3	2.3	11048	4.82597
6	conjunction	1	23	walnut_red	15.9	0.3	-0.9	11016	6.44981
6	conjunction	1	24	walnut_red	16.9	0.4	0.8	4185	1.97231
6	conjunction	1	25	acorn_blue	16.9	0.4	2.8	1916	2
6	conjunction	1	26	walnut_red	14.3	0.2	5.5	4601	3.74833
6	conjunction	1	27	walnut_red	15.9	0.4	9.9	6817	4.68188
6	conjunction	1	28	walnut_red	9.6	0.2	9.3	10884	6.32851
6	conjunction	1	29	acorn_blue	7.4	-0.2	8.2	2500	2.45967
6	conjunction	1	30	walnut_red	1.8	-0.4	7.5	7299	5.64358
6	conjunction	2	1	walnut_red	-2.6	-0.3	-5.6	0	0
6	conjunction	2	2	acorn_blue	-1.9	-0.1	-4.1	2771	1.65529
6	conjunction	2	3	walnut_red	2.5	0.5	-0.8	6846	5.5
6	conjunction	2	4	walnut_red	2.4	0.6	0.6	2352	1.40357
6	conjunction	2	5	walnut_red	3.6	0.3	1.9	2650	1.76918
6	conjunction	2	6	acorn_blue	6.3	-0.4	5.4	5050	4.42041
6	conjunction	2	7	acorn_blue	8.5	-0.1	7.8	2566	3.25576
6	conjunction	2	8	acorn_blue	6.4	-0.1	10.9	8065	3.74433
6	conjunction	2	9	walnut_red	2.7	0	11.7	3170	3.7855
6	conjunction	2	10	acorn_blue	-1.6	-0.5	7.7	12523	5.87282
6	conjunction	2	11	walnut_red	-3	-0.5	6.9	1326	1.61245
6	conjunction	2	12	acorn_blue	-6.7	-0.4	4.1	7818	4.64004
6	conjunction	2	13	acorn_blue	-11.7	-0.3	3.6	4183	5.02494
6	conjunction	2	14	walnut_red	-13.4	0	3.5	1585	1.70294
6	conjunction	2	15	walnut_red	-16	0.2	5.4	4890	3.22025
6	conjunction	2	16	acorn_blue	-12.5	0	7.5	9260	4.08167
6	conjunction	2	17	acorn_blue	-12	0.2	11.8	5084	4.32897
6	conjunction	2	18	walnut_red	-7.9	-0.1	11.9	5749	4.10122
6	conjunction	2	19	acorn_blue	-6.2	0	13.5	7652	2.33452
6	conjunction	2	20	acorn_blue	-7	0.2	16.1	4986	2.72029
6	conjunction	2	21	acorn_blue	3.8	0.5	16.5	15165	10.8074
6	conjunction	2	22	walnut_red	4.7	0.3	14.7	3099	2.01246
6	conjunction	2	23	acorn_blue	12.6	-0.1	4	18876	13.3004
6	conjunction	2	24	acorn_blue	11.3	0.1	7.5	11152	3.73363
6	conjunction	2	25	acorn_blue	13.4	0.2	8.2	2341	2.21359
6	conjunction	2	26	walnut_red	14.3	0.2	5.5	5166	2.84605
6	conjunction	2	27	walnut_red	15.4	0.2	2.7	3534	3.00832
6	conjunction	2	28	walnut_red	16.9	0.4	0.8	3134	2.42074
6	conjunction	2	29	walnut_red	15.9	0.3	-0.9	2637	1.97231
6	conjunction	2	30	walnut_red	16.2	0.5	-6.7	8719	5.80775
6	conjunction	3	1	walnut_red	5.3	0.2	-17	0	0
6	conjunction	3	2	acorn_blue	6.5	0.2	-16.2	1383	1.44222
6	conjunction	3	3	walnut_red	9.5	0.1	-14.6	4506	3.4
6	conjunction	3	4	acorn_blue	10.6	0	-13.7	2244	1.42127
6	conjunction	3	5	acorn_blue	10.6	-0.1	-11.8	4068	1.9
6	conjunction	3	6	walnut_red	8.9	-0.2	-10.8	3133	1.97231
6	conjunction	3	7	acorn_blue	-1.8	-0.2	-9.3	18500	10.8046
6	conjunction	3	8	walnut_red	-4.8	-0.1	-11.1	4249	3.49857
6	conjunction	3	9	acorn_blue	-5.8	-0.1	-12.7	2985	1.8868
6	conjunction	3	10	walnut_red	10.9	-0.3	-7.6	37102	17.4614
6	conjunction	3	11	acorn_blue	13.5	0.1	-7.7	3284	2.60192
6	conjunction	3	12	acorn_blue	16.9	0.4	0.8	15951	9.15478
6	conjunction	3	13	walnut_red	16.9	0.4	2.8	1800	2
6	conjunction	3	14	walnut_red	15.4	0.2	2.7	3350	1.50333
6	conjunction	3	15	acorn_blue	15.9	0.4	9.9	11634	7.21734
6	conjunction	3	16	walnut_red	-6.1	0.3	16.6	39869	22.9976
6	conjunction	3	17	acorn_blue	-12	0.2	11.8	11784	7.60592
6	conjunction	3	18	acorn_blue	-8.7	-0.2	7	12217	5.82495
6	conjunction	3	19	acorn_blue	-6.7	-0.4	4.1	6151	3.52278
6	conjunction	3	20	walnut_red	-6.2	-0.3	2.9	2483	1.3
6	conjunction	3	21	acorn_blue	-2.8	0.4	-0.8	10017	5.02494
6	conjunction	3	22	walnut_red	-5	-0.1	-1.8	8267	2.41661
6	conjunction	3	23	walnut_red	4	0.1	-15.6	26052	16.4754
6	conjunction	3	24	acorn_blue	3.6	0.2	-16.7	2586	1.17047
6	conjunction	3	25	acorn_blue	5.8	0	-13.7	9481	3.72022
6	conjunction	3	26	acorn_blue	13.2	0	-0.3	34195	15.3075
6	conjunction	3	27	acorn_blue	1.8	-0.4	7.5	34560	13.813
6	conjunction	3	28	acorn_blue	0.1	-0.4	7.1	2624	1.74642
6	conjunction	3	29	walnut_red	-1.7	-0.4	6.4	1809	1.93132
6	conjunction	3	30	acorn_blue	-4.9	-0.1	11.5	22184	6.0208
6	conjunction	4	1	acorn_blue	-1.6	0.5	-1.5	0	0
6	conjunction	4	2	acorn_blue	-2.5	0.4	-1.9	1194	0.984886
6	conjunction	4	3	walnut_red	-2.6	-0.3	-5.6	12541	3.70135
6	conjunction	4	4	acorn_blue	-1	-0.4	-6.4	1533	1.78885
6	conjunction	4	5	walnut_red	0.7	-0.3	-6.4	1401	1.7
6	conjunction	4	6	walnut_red	3.9	-0.1	-11.9	17949	6.36318
6	conjunction	4	7	walnut_red	3.7	0	-14.1	3718	2.20907
6	conjunction	4	8	walnut_red	1.2	0.3	-18.6	7823	5.14782
6	conjunction	4	9	walnut_red	-9.4	0	-12.5	25829	12.2299
6	conjunction	4	10	walnut_red	-15.3	0.2	-8.2	26134	7.30068
6	conjunction	4	11	acorn_blue	-16.8	0.3	-7.8	2417	1.55242
6	conjunction	4	12	acorn_blue	-15.4	0.2	-5.1	12084	3.04138
6	conjunction	4	13	walnut_red	-17.5	0.3	-3.3	3984	2.76586
6	conjunction	4	14	walnut_red	-15.2	0.1	3	10242	6.70671
6	conjunction	4	15	acorn_blue	-16.4	0.3	7.5	6079	4.65725
6	conjunction	4	16	acorn_blue	-14.4	0.1	6.6	3981	2.19317
6	conjunction	4	17	walnut_red	-12.1	-0.1	5.9	1982	2.40416
6	conjunction	4	18	walnut_red	-7.6	-0.4	6	3824	4.50111
6	conjunction	4	19	acorn_blue	-3	-0.5	6.9	4044	4.68722
6	conjunction	4	20	walnut_red	-1.6	-0.5	7.7	2783	1.61245
6	conjunction	4	21	acorn_blue	0.1	-0.4	7.1	3634	1.80278
6	conjunction	4	22	acorn_blue	8.1	0	10.2	12783	8.57963
6	conjunction	4	23	walnut_red	9.6	0.2	9.3	3508	1.74929
6	conjunction	4	24	walnut_red	11.3	0.1	7.5	2261	2.47588
6	conjunction	4	25	walnut_red	13.4	0.2	8.2	4165	2.21359
6	conjunction	4	26	acorn_blue	15.9	0.4	9.9	3684	3.02324
6	conjunction	4	27	acorn_blue	15.4	0.2	2.7	15473	7.21734
6	conjunction	4	28	walnut_red	10.3	-0.3	2.3	27496	5.11566
6	conjunction	4	29	acorn_blue	10.8	-0.3	1.4	2208	1.02956
6	conjunction	4	30	acorn_blue	12.1	-0.1	0.7	1701	1.47648
6	conjunction	5	1	walnut_red	-1.6	0.5	-1.5	0	0
6	conjunction	5	2	acorn_blue	1.8	0.3	-2.7	9417	3.60555
6	conjunction	5	3	walnut_red	0.7	-0.3	-6.4	5451	3.86005
6	conjunction	5	4	acorn_blue	3.3	-0.1	-9.2	7733	3.82099
6	conjunction	5	5	walnut_red	3.9	-0.1	-11.9	2318	2.76586
6	conjunction	5	6	acorn_blue	7.6	0.1	-15.3	7673	5.02494
6	conjunction	5	7	acorn_blue	6.5	0.2	-16.2	1794	1.42127
6	conjunction	5	8	walnut_red	3.6	0.2	-16.7	3933	2.94279
6	conjunction	5	9	acorn_blue	0.8	0.2	-17	8268	2.81603
6	conjunction	5	10	acorn_blue	-2.1	0.2	-13.9	12725	4.245
6	conjunction	5	11	walnut_red	-5.8	-0.1	-12.7	21460	3.88973
6	conjunction	5	12	acorn_blue	-8.9	-0.1	-7.2	10467	6.31348
6	conjunction	5	13	acorn_blue	-9.8	-0.2	-4.7	8286	2.65707
6	conjunction	5	14	walnut_red	-9.3	-0.4	-2.7	3119	2.06155
6	conjunction	5	15	acorn_blue	-7.6	-0.4	6	7413	8.86454
6	conjunction	5	16	walnut_red	-8.7	-0.2	7	2167	1.48661
6	conjunction	5	17	acorn_blue	-12	0.2	11.8	6533	5.82495
6	conjunction	5	18	acorn_blue	-12.6	0.1	9.8	3317	2.08806
6	conjunction	5	19	walnut_red	-13.7	0.1	9.1	4350	1.30384
6	conjunction	5	20	acorn_blue	-12.1	-0.1	5.9	5017	3.57771
6	conjunction	5	21	acorn_blue	-6.2	-0.3	2.9	5583	6.61891
6	conjunction	5	22	acorn_blue	-4.4	0	2.4	1534	1.86815
6	conjunction	5	23	walnut_red	-2.9	0.3	1.7	3234	1.65529
6	conjunction	5	24	acorn_blue	-13.4	0	3.5	21352	10.6532
6	conjunction	5	25	walnut_red	-15.2	0.1	3	2483	1.86815
6	conjunction	5	26	acorn_blue	-15	0.2	-3.7	13016	6.70298
6	conjunction	5	27	walnut_red	-16	0.3	-6.3	7501	2.78568
6	conjunction	5	28	acorn_blue	-14.4	0.1	-9.3	11718	3.4
6	conjunction	5	29	acorn_blue	-11.8	0.2	-13.1	8303	4.60435
6	conjunction	5	30	walnut_red	-6.1	-0.3	-10.1	17014	6.44127
7	feature	1	1	acorn_blue	15	0.2	1.3	0	0
7	feature	1	2	acorn_red	16.9	0.4	2.8	2232	2.42074
7	feature	1	3	acorn_red	17.6	0.6	-2.3	7238	5.14782
7	feature	1	4	acorn_red	16.2	0.5	-6.7	5461	4.61736
7	feature	1	5	acorn_blue	15.9	0.4	-7.8	909	1.14018
7	feature	1	6	acorn_blue	14.8	0.2	-9	2392	1.62788
7	feature	1	7	acorn_red	10.6	-0.2	-10.5	5816	4.45982
7	feature	1	8	acorn_red	10.6	-0.1	-11.8	3619	1.3
7	feature	1	9	acorn_red	9.5	0.1	-14.6	2400	3.00832
7	feature	1	10	acorn_red	7.6	0.1	-15.3	2615	2.02485
7	feature	1	11	acorn_blue	6.5	0.2	-16.2	3520	1.42127
7	feature	1	12	acorn_red	4	0.1	-15.6	4082	2.57099
7	feature	1	13	acorn_red	3.6	0.2	-16.7	2183	1.17047
7	feature	1	14	acorn_red	2.4	0.3	-17.8	1400	1.62788
7	feature	1	15	acorn_red	-9.7	0.3	-15.6	15390	12.2984
7	feature	1	16	acorn_red	-11.8	0.2	-13.1	2627	3.26497
7	feature	1	17	acorn_blue	-11.4	0	-11.7	2668	1.45602
7	feature	1	18	acorn_red	-13.9	0.2	-11.3	3467	2.5318
7	feature	1	19	acorn_blue	-15.4	0.2	-9.6	3132	2.26716
7	feature	1	20	acorn_red	-16	0.3	-6.3	6118	3.3541
7	feature	1	21	acorn_blue	-17.5	0.3	-3.3	4850	3.3541
7	feature	1	22	acorn_red	-18	0.4	-1.3	2716	2.06155
7	feature	1	23	acorn_red	-16	0.2	5.4	8814	6.99214
7	feature	1	24	acorn_blue	-14.4	0.1	6.6	1705	2
7	feature	1	25	acorn_red	-12.5	0	7.5	1699	2.10238
7	feature	1	26	acorn_blue	-12	0.3	13.8	6767	6.31981
7	feature	1	27	acorn_blue	-6.1	0.3	16.6	7007	6.5307
7	feature	1	28	acorn_blue	1.5	0.3	14.6	7676	7.85875
7	feature	1	29	acorn_blue	10.8	-0.3	1.4	29703	16.1471
7	feature	1	30	acorn_blue	9.4	-0.4	-1.6	4550	3.31059
7	feature	2	1	acorn_red	-1.6	0.5	-1.5	0	0
7	feature	2	2	acorn_blue	-1.9	-0.1	-4.1	5918	2.61725
7	feature	2	3	acorn_blue	-2.6	-0.3	-5.6	1466	1.65529
7	feature	2	4	acorn_red	-1	-0.4	-6.4	2751	1.78885
7	feature	2	5	acorn_red	2.2	-0.2	-6.2	4844	3.20624
7	feature	2	6	acorn_blue	3.3	-0.1	-9.2	5439	3.19531
7	feature	2	7	acorn_red	4.9	-0.1	-9.8	1500	1.7088
7	feature	2	8	acorn_red	6.3	-0.2	-9.8	1867	1.4
7	feature	2	9	acorn_blue	8.1	-0.3	-9.1	2449	1.93132
7	feature	2	10	acorn_red	16.2	0.5	-6.7	10224	8.44808
7	feature	2	11	acorn_blue	15.9	0.4	-7.8	5179	1.14018
7	feature	2	12	acorn_red	13.5	0.1	-7.7	3584	2.40208
7	feature	2	13	acorn_blue	8	-0.5	-4.9	5365	6.17171
7	feature	2	14	acorn_red	6.8	-0.6	-3.3	1634	2
7	feature	2	15	acorn_red	5.6	-0.2	-1.4	1783	2.24722
7	feature	2	16	acorn_red	2.4	0.6	0.6	3168	3.77359
7	feature	2	17	acorn_red	-2.1	0.3	2.8	5533	5.00899
7	feature	2	18	acorn_blue	-2.9	0.3	1.7	2818	1.36015
7	feature	2	19	acorn_blue	-2.8	0.4	-0.8	2700	2.502
7	feature	2	20	acorn_red	2.5	0.5	-0.8	9883	5.3
7	feature	2	21	acorn_blue	1.8	0.3	-2.7	5617	2.02485
7	feature	2	22	acorn_blue	4.4	-0.2	-3.2	10501	2.64764
7	feature	2	23	acorn_red	0.6	0.5	3	9783	7.27186
7	feature	2	24	acorn_red	0.1	0.1	4.1	1772	1.2083
7	feature	2	25	acorn_blue	-3	-0.5	6.9	3615	4.17732
7	feature	2	26	acorn_blue	-5.2	-0.5	7.4	2964	2.2561
7	feature	2	27	acorn_blue	-5.9	-0.5	5.4	5366	2.11896
7	feature	2	28	acorn_red	-3.9	-0.4	5.5	3351	2.0025
7	feature	2	29	acorn_red	-1.6	-0.5	7.7	3651	3.18277
7	feature	2	30	acorn_red	2.8	-0.2	10.3	4717	5.11077
7	feature	3	1	acorn_red	-4	0.1	0.6	0	0
7	feature	3	2	acorn_red	-6.2	-0.3	2.9	2850	3.18277
7	feature	3	3	acorn_red	-6.7	-0.4	4.1	1018	1.3
7	feature	3	4	acorn_red	-6.9	-0.3	7.7	2850	3.60555
7	feature	3	5	acorn_blue	-5.2	-0.5	7.4	2616	1.72627
7	feature	3	6	acorn_blue	-3	-0.5	6.9	1873	2.2561
7	feature	3	7	acorn_red	1.8	-0.4	7.5	6011	4.83735
7	feature	3	8	acorn_red	5	-0.4	5.1	5417	4
7	feature	3	9	acorn_red	10.5	-0.1	3.4	5701	5.75674
7	feature	3	10	acorn_red	12.6	-0.1	4	1734	2.18403
7	feature	3	11	acorn_blue	14.1	0	3	2298	1.80278
7	feature	3	12	acorn_red	16.9	0.4	2.8	3802	2.80713
7	feature	3	13	acorn_red	17.2	0.6	-0.5	4320	3.31361
7	feature	3	14	acorn_red	14	0.2	-5.3	4963	5.76888
7	feature	3	15	acorn_red	14.2	0.1	-6.8	2334	1.51327
7	feature	3	16	acorn_blue	15.9	0.4	-7.8	3367	1.97231
7	feature	3	17	acorn_blue	13.2	0.1	-12.6	6366	5.50727
7	feature	3	18	acorn_blue	11.4	-0.1	-11.8	5508	1.96977
7	feature	3	19	acorn_blue	10.6	-0.1	-11.8	1659	0.8
7	feature	3	20	acorn_red	9.1	-0.1	-12.5	1441	1.65529
7	feature	3	21	acorn_red	8.9	-0.2	-10.8	2593	1.71172
7	feature	3	22	acorn_red	9.5	-0.3	-9	1534	1.89737
7	feature	3	23	acorn_blue	10.9	-0.3	-7.6	3599	1.9799
7	feature	3	24	acorn_red	10.6	-0.2	-10.5	4874	2.91548
7	feature	3	25	acorn_red	6.5	0.2	-16.2	6035	7.0214
7	feature	3	26	acorn_red	3.6	0.2	-16.7	2459	2.94279
7	feature	3	27	acorn_red	1.5	0.3	-15.7	2350	2.32594
7	feature	3	28	acorn_blue	0.8	0.2	-17	2818	1.47648
7	feature	3	29	acorn_red	-7.4	0.2	-15.6	8082	8.31865
7	feature	3	30	acorn_red	-9.1	0.2	-14	1963	2.33452
7	feature	4	1	acorn_red	-5.5	-0.2	-0.8	0	0
7	feature	4	2	acorn_blue	-8.8	-0.3	-3.9	4983	4.52769
7	feature	4	3	acorn_red	-11.3	-0.1	-4.3	3017	2.5318
7	feature	4	4	acorn_blue	-13	0	-4.5	2633	1.71172
7	feature	4	5	acorn_blue	-15.4	0.2	-5.1	2068	2.47386
7	feature	4	6	acorn_red	-16	0.3	-6.3	1916	1.34164
7	feature	4	7	acorn_red	-16.8	0.3	-7.8	1434	1.7
7	feature	4	8	acorn_blue	-9.4	0	-12.5	11400	8.76641
7	feature	4	9	acorn_red	-3.9	-0.1	-9.5	5284	6.26498
7	feature	4	10	acorn_blue	-1.8	-0.2	-9.3	1650	2.1095
7	feature	4	11	acorn_blue	2.6	-0.2	-10.5	3667	4.5607
7	feature	4	12	acorn_red	3.3	-0.1	-9.2	2350	1.47648
7	feature	4	13	acorn_blue	4.9	-0.1	-9.8	3350	1.7088
7	feature	4	14	acorn_blue	6.4	0	-12	3417	2.66271
7	feature	4	15	acorn_red	3.6	0.2	-16.7	12760	5.47083
7	feature	4	16	acorn_red	3.7	0.3	-17.8	2207	1.10454
7	feature	4	17	acorn_red	2.4	0.3	-17.8	2367	1.3
7	feature	4	18	acorn_blue	0.8	0.2	-17	2232	1.78885
7	feature	4	19	acorn_blue	1.5	0.3	-15.7	2526	1.47648
7	feature	4	20	acorn_blue	-2.1	0.2	-13.9	4909	4.02492
7	feature	4	21	acorn_red	-3.9	0	-13.2	2551	1.93132
7	feature	4	22	acorn_red	-1.5	0	-12	4038	2.68328
7	feature	4	23	acorn_blue	-3	-0.1	-11.2	3552	1.7
7	feature	4	24	acorn_red	0.8	-0.3	-7.4	5844	5.37401
7	feature	4	25	acorn_blue	0.7	-0.3	-6.4	1766	1.00499
7	feature	4	26	acorn_red	-0.3	-0.2	-5.1	2108	1.64012
7	feature	4	27	acorn_red	-1.2	0.4	-2.9	1993	2.37697
7	feature	4	28	acorn_red	-2.8	0.4	-0.8	2167	2.64008
7	feature	4	29	acorn_blue	-2.9	0.3	1.7	3857	2.502
7	feature	4	30	acorn_red	-2.1	0.3	2.8	1409	1.36015
7	feature	5	1	acorn_red	-5.3	-0.1	1.8	0	0
7	feature	5	2	acorn_blue	-6.2	-0.3	2.9	2231	1.42127
7	feature	5	3	acorn_red	-6.7	-0.4	4.1	1378	1.3
7	feature	5	4	acorn_red	-5.9	-0.5	5.4	1268	1.52643
7	feature	5	5	acorn_blue	-3.3	-0.4	9.2	3899	4.60435
7	feature	5	6	acorn_red	-1.6	-0.5	7.7	2957	2.26716
7	feature	5	7	acorn_red	-0.3	-0.2	5.6	2103	2.46982
7	feature	5	8	acorn_blue	0.1	0.1	4.1	2091	1.55242
7	feature	5	9	acorn_blue	0.6	0.5	3	1984	1.2083
7	feature	5	10	acorn_blue	2.3	0.5	2.5	3650	1.772
7	feature	5	11	acorn_blue	3.6	0.3	1.9	2470	1.43178
7	feature	5	12	acorn_red	5.6	-0.2	-1.4	6814	3.85876
7	feature	5	13	acorn_red	9.4	-0.4	-1.6	4700	3.80526
7	feature	5	14	acorn_red	10.8	-0.3	1.4	4017	3.31059
7	feature	5	15	acorn_blue	10.3	-0.3	2.3	2867	1.02956
7	feature	5	16	acorn_blue	10.5	-0.1	3.4	3136	1.11803
7	feature	5	17	acorn_red	11.4	0	5.9	2380	2.65707
7	feature	5	18	acorn_blue	13.4	0.2	8.2	2784	3.04795
7	feature	5	19	acorn_blue	15.9	0.4	9.9	2489	3.02324
7	feature	5	20	acorn_red	17.4	0.4	5.2	14000	4.93356
7	feature	5	21	acorn_red	16.9	0.4	2.8	9179	2.45153
7	feature	5	22	acorn_red	12.6	-0.1	4	3784	4.4643
7	feature	5	23	acorn_red	8	-0.5	-4.9	10718	10.0185
7	feature	5	24	acorn_blue	6.2	-0.6	-4.6	3532	1.82483
7	feature	5	25	acorn_blue	4.4	-0.2	-3.2	2118	2.28035
7	feature	5	26	acorn_blue	1.8	0.3	-2.7	2233	2.64764
7	feature	5	27	acorn_red	1.2	0.4	-2.7	455	0.6
7	feature	5	28	acorn_blue	-1.2	0.4	-2.9	3845	2.40832
7	feature	5	29	acorn_blue	-7.2	-0.3	-8.2	8267	8.00562
7	feature	5	30	acorn_red	-6.1	-0.3	-10.1	3233	2.19545
7	conjunction	1	1	acorn_blue	-2.9	0.3	1.7	0	0
7	conjunction	1	2	acorn_blue	-4.4	0	2.4	2734	1.65529
7	conjunction	1	3	walnut_red	-7.6	-0.4	6	4625	4.81664
7	conjunction	1	4	walnut_red	-8.7	-0.2	7	1241	1.48661
7	conjunction	1	5	acorn_blue	-6.9	-0.3	7.7	3257	1.93132
7	conjunction	1	6	acorn_blue	-3.3	-0.4	9.2	3133	3.9
7	conjunction	1	7	acorn_blue	-2	-0.3	10.7	1677	1.98494
7	conjunction	1	8	acorn_blue	1.5	0.3	14.6	4322	5.24023
7	conjunction	1	9	walnut_red	4.7	0.3	14.7	5501	3.20156
7	conjunction	1	10	acorn_blue	6	0.5	16.3	2595	2.06155
7	conjunction	1	11	walnut_red	0.8	0.5	17.1	9651	5.26118
7	conjunction	1	12	walnut_red	-7	0.2	16.1	12947	7.86384
7	conjunction	1	13	acorn_blue	-10.6	0.1	13.6	5003	4.38292
7	conjunction	1	14	acorn_blue	-15.8	0.2	10.5	11751	6.05392
7	conjunction	1	15	acorn_blue	-16.4	0.3	7.5	3950	3.05941
7	conjunction	1	16	walnut_red	-18.3	0.4	4.1	4117	3.89487
7	conjunction	1	17	walnut_red	-12.7	0	-6	10684	11.5486
7	conjunction	1	18	walnut_red	-11.3	-0.1	-4.3	2784	2.20227
7	conjunction	1	19	acorn_blue	-9.8	-0.2	-4.7	5839	1.55242
7	conjunction	1	20	acorn_blue	-7.7	-0.2	-6.5	3483	2.76586
7	conjunction	1	21	walnut_red	-6.1	-0.3	-10.1	4832	3.93954
7	conjunction	1	22	walnut_red	-4.8	-0.1	-11.1	2629	1.64012
7	conjunction	1	23	acorn_blue	-3	-0.1	-11.2	2851	1.80278
7	conjunction	1	24	acorn_blue	-2.6	-0.3	-5.6	10468	5.61427
7	conjunction	1	25	walnut_red	-15.4	0.2	-5.1	17767	12.8098
7	conjunction	1	26	acorn_blue	-15.3	0.2	-8.2	3600	3.10161
7	conjunction	1	27	acorn_blue	-15.4	0.2	-9.6	2333	1.40357
7	conjunction	1	28	walnut_red	-13.9	0.2	-11.3	3534	2.26716
7	conjunction	1	29	acorn_blue	-9.7	0.3	-15.6	4985	6.01082
7	conjunction	1	30	acorn_blue	-3.9	0	-13.2	7999	6.27694
7	conjunction	2	1	walnut_red	1.2	0.4	-2.7	0	0
7	conjunction	2	2	acorn_blue	2.2	-0.2	-6.2	3067	3.64005
7	conjunction	2	3	acorn_blue	0.8	-0.3	-7.4	1617	1.84391
7	conjunction	2	4	walnut_red	0.7	-0.3	-6.4	2982	1.00499
7	conjunction	2	5	walnut_red	6.2	-0.6	-4.6	5901	5.78705
7	conjunction	2	6	walnut_red	10.8	-0.3	1.4	9725	7.56042
7	conjunction	2	7	walnut_red	13.4	0	1.6	3026	2.60768
7	conjunction	2	8	acorn_blue	15.9	0.4	9.9	9775	8.66833
7	conjunction	2	9	acorn_blue	8.5	-0.1	7.8	9843	7.6922
7	conjunction	2	10	acorn_blue	6.3	-0.4	5.4	2564	3.25576
7	conjunction	2	11	walnut_red	3.6	0.3	1.9	3670	4.42041
7	conjunction	2	12	walnut_red	2.3	0.5	2.5	2333	1.43178
7	conjunction	2	13	acorn_blue	-1	0.1	4	4733	3.62491
7	conjunction	2	14	acorn_blue	0.1	-0.4	7.1	5665	3.28938
7	conjunction	2	15	walnut_red	-3	-0.5	6.9	5353	3.10644
7	conjunction	2	16	acorn_blue	-5.2	-0.5	7.4	1801	2.2561
7	conjunction	2	17	acorn_blue	-8.7	-0.2	7	2755	3.52278
7	conjunction	2	18	walnut_red	-11	0	8.9	2495	2.98329
7	conjunction	2	19	walnut_red	-12.5	0	7.5	5433	2.05183
[truncated: 1,601 more rows]
